# Supplementary material for: Provenance and tectonic settings of Late Triassic–Jurassic deposits in the southwestern margin of the Yangtze Block: Evidence from whole-rock elemental compositions and detrital zircon U‒Pb ages and Hf isotopes, SW China
Source: Research Square preprint supplement (doi:10.21203/rs.3.rs-5860486/v1), 2025-04-24
Supplement: Supplementary file 1 [file 7d9b4305627b5e9c12264d19.xlsx]

## Sheet: Sheet1
	176Hf/177Hf	1σ	176Lu/177Hf	1σ	176Yb/177Hf	1σ	Hf	Yb	Lu	Age (Ma)	εHf(0)	1σ	εHf(t)	1σ	TDM1	TDM2	fLu/Hf
YTP-1-G1-001	0.28121	9.1463e-06	0.000553706	1.33473e-06	0.0197739	9.66997e-05	6448.72	129.834	23.0623	2543	-55.2347	0.603878	0.906065	0.762677	2811.83	2922.45	-0.983322
YTP-1-G1-004	0.282702	1.22808e-05	0.00076672	6.04364e-06	0.0251825	0.000360049	6643.45	174.813	33.2968	243	-2.47634	0.671886	2.74056	0.685427	774.355	988.803	-0.976906
YTP-1-G1-008	0.281907	9.71306e-06	0.00105434	9.39592e-06	0.0350394	0.000482725	8369.32	301.293	57.6501	788	-30.5979	0.615894	-13.7736	0.664451	1892.64	2326.65	-0.968243
YTP-1-G1-009	0.28242	2.26124e-05	0.000257046	1.79168e-06	0.00940366	0.00012749	5860.14	57.8562	9.88167	207	-12.449	0.949612	-7.94148	0.957828	1153.05	1552.79	-0.992258
YTP-1-G1-010	0.282545	1.20468e-05	0.00068172	1.81374e-05	0.0232506	0.000709359	5620.01	138.541	25.8043	823	-8.0374	0.666348	9.78679	0.717398	992.278	1061.13	-0.979466
YTP-1-G1-013	0.282724	1.02602e-05	0.000500826	7.18996e-06	0.0162495	0.000169738	5322.6	86.0379	16.7842	415	-1.68341	0.628101	7.31776	0.652848	737.715	871.15	-0.984915
YTP-1-G1-019	0.282667	1.65154e-05	0.00147464	2.30881e-05	0.0431909	0.000532053	5462.78	237.4	51.0131	199	-3.70885	0.777089	0.467486	0.788584	838.884	1080.29	-0.955583
YTP-1-G1-020	0.282595	1.01415e-05	0.000669478	7.8198e-06	0.02236	0.00035596	6206.62	143.273	27.2381	423	-6.24994	0.625493	2.874	0.650881	921.477	1124.46	-0.979835
YTP-1-G1-023	0.281253	1.04844e-05	0.000537546	2.53713e-06	0.0184405	0.000160233	5691.46	108.165	19.9625	2522	-53.7303	0.630553	1.96946	0.784022	2753.52	2848.93	-0.983809
YTP-1-G1-027	0.282473	1.02754e-05	0.000192742	4.34691e-06	0.00685244	0.00014716	6735.83	46.2014	8.26082	204	-10.5716	0.62804	-6.12005	0.639896	1078.24	1449.73	-0.994195
YTP-1-G1-029	0.282435	1.1257e-05	0.000142935	3.64732e-06	0.00511345	0.000104662	6330.54	32.9529	5.84335	202	-11.9145	0.648688	-7.5007	0.660048	1128.93	1524.53	-0.995695
YTP-1-G1-031	0.282535	1.19469e-05	0.000465094	1.10945e-05	0.0157977	0.000340438	6601.65	105.36	19.6914	436	-8.39162	0.66408	1.07122	0.68965	1000.55	1234.72	-0.985991
YTP-1-G1-037	0.281458	1.99079e-05	0.000522324	8.50721e-06	0.0156995	0.000188609	4842.44	76.5734	16.0506	1905	-46.4735	0.869574	-4.65252	0.963983	2476.1	2711.77	-0.984267
YTP-1-G1-038	0.282685	1.42619e-05	0.00074872	7.27733e-06	0.021442	0.000207606	6059.17	133.479	29.1877	435	-3.06012	0.71914	6.30415	0.74248	797.129	943.522	-0.977448
YTP-1-G1-061	0.281697	1.29662e-05	0.000524205	7.88615e-06	0.0171762	0.000369818	6002.04	106.921	20.6242	1836	-38.0076	0.686446	2.29871	0.79324	2151.99	2282.38	-0.984211
YTP-1-G1-062	0.282023	2.70654e-05	0.000854265	3.42855e-05	0.0281047	0.00122037	6947.2	211.061	40.5647	1842	-26.4879	1.08521	13.5903	1.19038	1722.42	1674.55	-0.974269
YTP-1-G1-063	0.282712	1.01801e-05	0.0004571	3.79234e-06	0.0141973	7.38267e-05	6182	89.7546	18.2071	431	-2.13388	0.626449	7.22813	0.651675	754.604	888.932	-0.986232
YTP-1-G1-066	0.283084	1.4218e-05	0.00152633	1.33239e-05	0.0467291	0.000276014	5644.54	270.706	55.8995	783	11.0273	0.718569	27.5697	0.763336	240.846	37.3533	-0.954026
YTP-1-G1-067	0.281431	8.92663e-06	0.000320979	1.84516e-06	0.0109417	6.86357e-05	6216.51	70.2397	12.9573	2487	-47.4277	0.600093	7.87799	0.756498	2499.53	2504.8	-0.990332
YTP-1-G1-069	0.282509	1.19564e-05	0.000552851	3.71636e-06	0.0193349	0.000129327	5624.43	111.08	20.0221	756	-9.30994	0.664257	7.11325	0.706759	1038.9	1155.33	-0.983348
YTP-1-G1-071	0.281994	1.26542e-05	0.000723429	1.16033e-05	0.0240254	0.000342795	7189.53	176.521	33.5465	1876	-27.53	0.679528	13.4654	0.79248	1757.09	1708.91	-0.97821
YTP-1-G1-078	0.281557	1.17256e-05	0.000543641	7.61773e-06	0.0164799	0.000188322	5007.59	85.4196	17.6434	2527	-42.9796	0.65775	12.8847	0.811733	2343.82	2268.38	-0.983625
YTP-1-G1-080	0.281404	1.05276e-05	0.000367218	3.86667e-06	0.0117835	0.000162009	6139.83	75.9696	14.8304	2522	-48.395	0.631675	7.62715	0.786206	2539.25	2546.47	-0.988939
YTP-27-G1-002	0.282545	1.12653e-05	0.000604087	1.2912e-05	0.0206573	0.000305998	8775.07	195.259	43.4739	407	-8.02924	0.649027	0.764026	0.673568	989.938	1228.73	-0.981805
YTP-27-G1-003	0.281958	1.21924e-05	0.00135571	1.7202e-05	0.0490575	0.000874424	7118.77	392.511	82.5953	826	-28.7928	0.668836	-11.3121	0.719472	1836.5	2222.19	-0.959165
YTP-27-G1-006	0.281656	1.19777e-05	0.000878285	9.74118e-06	0.0365343	0.000296399	6754.56	268.451	49.4787	1857	-39.4789	0.663545	0.848728	0.775474	2228.89	2377.44	-0.973546
YTP-27-G1-007	0.282115	1.16293e-05	0.000738611	1.83353e-05	0.0324604	0.000464697	8856.67	305.925	51.9485	875	-23.2468	0.656397	-4.34764	0.711178	1590.84	1880.49	-0.977753
YTP-27-G1-008	0.28211	1.62105e-05	0.00327408	1.97319e-05	0.134585	0.00144932	5195.84	775.2	143.116	735	-23.4013	0.768344	-8.79287	0.810434	1710.31	2013	-0.901383
YTP-27-G1-009	0.282512	1.65151e-05	0.000894033	1.60854e-05	0.0309977	0.000192703	9198.59	311.502	67.3468	472	-9.20788	0.776895	0.905309	0.802765	1044.22	1272.45	-0.973071
YTP-27-G1-012	0.282757	1.18952e-05	0.000918343	1.76043e-05	0.0336329	0.000285884	8384.54	304.044	61.9376	450	-0.534593	0.663231	9.1061	0.690884	700.076	799.594	-0.972339
YTP-27-G1-013	0.282426	1.47048e-05	0.00137837	4.23134e-05	0.0499433	0.000985975	6230.17	325.574	67.3249	833	-12.2308	0.729879	5.4175	0.787947	1178.86	1310.58	-0.958483
YTP-27-G1-017	0.28269	8.49211e-06	0.000784149	1.74906e-06	0.0335041	0.000261236	11796.7	435.089	77.9911	216	-2.90289	0.594122	1.73021	0.607116	791.637	1023.58	-0.976381
YTP-27-G1-020	0.281439	1.08281e-05	0.000448617	1.45193e-05	0.0194505	0.000431063	6892.07	143.449	25.068	1897	-47.127	0.638047	-5.39385	0.758633	2496.29	2745.25	-0.986487
YTP-27-G1-021	0.281641	9.49821e-06	0.00112218	1.25452e-05	0.0484127	0.000515975	9613.5	512.894	90.9552	1907	-39.9804	0.611287	1.14113	0.734432	2262.71	2401.57	-0.966199
YTP-27-G1-023	0.282398	1.81231e-05	0.00170952	2.05899e-05	0.0641	0.00137027	5458.02	400.338	79.426	819	-13.2268	0.820374	3.93947	0.866044	1229.58	1380.89	-0.948508
YTP-27-G1-032	0.282332	1.31687e-05	0.00179487	2.40343e-05	0.0705812	0.00142509	7527.32	609.08	116.725	404	-15.5605	0.692101	-7.15812	0.717308	1326.69	1663.8	-0.945938
YTP-27-G1-036	0.281854	1.27566e-05	0.00047563	1.61744e-05	0.0163147	0.000394145	8642.07	143.985	31.3291	839	-32.4615	0.681729	-14.2175	0.732209	1936.09	2390.74	-0.985674
YTP-27-G1-037	0.282373	1.14113e-05	0.000838635	1.59103e-05	0.0308205	0.00038972	8465.6	278.824	57.5287	232	-14.0958	0.651964	-9.13262	0.666106	1235.64	1638.01	-0.97474
YTP-27-G1-042	0.2825	1.27236e-05	0.00129038	1.14094e-05	0.0508235	0.000522109	7266.78	409.333	77.9445	212	-9.62278	0.681837	-5.14985	0.693969	1071.86	1402.15	-0.961133
YTP-27-G1-046	0.282115	1.54393e-05	0.00117336	6.7691e-06	0.046692	0.000443214	5667.86	292.922	55.4736	460	-23.24	0.748222	-13.4848	0.771971	1608.87	2055.17	-0.964658
YTP-27-G1-053	0.282211	1.09704e-05	0.00103411	2.00695e-05	0.0307335	0.000368176	7377.66	245.219	63.1612	285	-19.834	0.642195	-13.7738	0.660214	1468.81	1934.8	-0.968852
YTP-27-G1-055	0.282579	1.19022e-05	0.000848115	9.56694e-06	0.0332164	0.000273783	8315.6	305.682	59.1041	259	-6.80767	0.66314	-1.26267	0.678101	947.928	1223.89	-0.974454
YTP-27-G1-057	0.282467	1.20864e-05	0.000833969	1.48852e-05	0.0298278	0.000418738	7994.76	250.165	53.2205	437	-10.7862	0.667135	-1.4108	0.69335	1104.93	1372.83	-0.97488
YTP-7-G2-001	0.282048	1.35269e-05	0.00208603	6.25818e-05	0.0807035	0.00178049	8679.67	755.148	144.645	889	-25.6186	0.70031	-7.21772	0.771138	1744.8	2048.21	-0.937168
YTP-7-G2-005	0.281924	1.12318e-05	0.000975676	1.33417e-05	0.036676	0.000156961	7853.4	319.81	62.3589	880	-29.9749	0.647411	-11.1189	0.7012	1864.39	2254.02	-0.970612
YTP-7-G2-010	0.282534	3.50174e-05	0.00303264	4.37757e-05	0.116745	0.00136352	4389	539.2	103.318	793	-8.4171	1.34016	7.50851	1.38502	1073.53	1163.11	-0.908656
YTP-7-G2-018	0.282224	1.14345e-05	0.000667226	8.09364e-06	0.0270762	0.000258158	7926.38	237.506	43.5169	816	-19.373	0.652259	-1.71444	0.700223	1436.71	1689.51	-0.979903
YTP-7-G2-030	0.281349	1.24967e-05	0.00128206	4.84559e-05	0.0502423	0.00156931	6514.71	349.025	66.5335	2462	-50.3388	0.674989	2.77108	0.861801	2675.85	2758.05	-0.961384
YTP-7-G2-035	0.282682	1.34248e-05	0.00136879	1.29599e-05	0.0581451	0.000714166	9738.33	631.559	112.277	2535	-3.1822	0.698692	51.6696	0.853341	815.294	159.743	-0.958771
YTP-7-G2-042	0.28237	1.1539e-05	0.000895151	8.36334e-06	0.0367604	0.000483193	6698.87	278.024	50.9058	806	-14.2141	0.654764	3.11278	0.702111	1242.15	1416.09	-0.973038
YTP-7-G2-046	0.282147	1.32105e-05	0.0026252	3.43916e-05	0.0971941	0.000837669	9016.01	958.564	194.459	820	-22.0878	0.692848	-5.41692	0.748123	1625.85	1895.39	-0.920928
YTP-7-G2-047	0.281192	9.53526e-06	0.000688251	2.14706e-06	0.0295997	0.000117985	8657.63	286.563	50.0519	2354	-55.873	0.611328	-4.2379	0.756839	2845.91	3045.88	-0.97927
YTP-7-G2-048	0.281296	1.19737e-05	0.000867899	1.31655e-05	0.0322972	0.000514063	8583.3	316.673	63.6913	2490	-52.2121	0.662953	2.2098	0.818581	2718.94	2810.47	-0.973858
YTP-7-G2-051	0.282445	1.69044e-05	0.00139941	2.45574e-05	0.0445669	0.000617612	7841.58	383.036	90.2606	275	-11.5771	0.787217	-5.79178	0.803205	1153.34	1487.16	-0.957849
YTP-7-G2-052	0.282292	1.24215e-05	0.00137742	3.42004e-05	0.0511932	0.000828042	9122.25	497.389	97.548	456	-16.9626	0.674549	-7.34809	0.705399	1367.86	1715.16	-0.958511
YTP-7-G2-053	0.281892	1.51624e-05	0.00118295	3.33184e-05	0.0510284	0.00105449	8723.79	495.844	86.7844	813	-31.1143	0.740829	-13.8218	0.79365	1919.34	2348.73	-0.964369
YTP-7-G2-054	0.282369	1.73454e-05	0.00108044	4.69224e-05	0.033637	0.00134743	6473.06	212.885	50.556	265	-14.2573	0.799039	-8.62854	0.817292	1249.96	1635.98	-0.967457
YTP-7-G2-057	0.282194	1.2996e-05	0.00132456	1.33127e-05	0.0557699	0.000277037	6833.91	424.287	75.9569	752	-20.4233	0.68782	-4.49277	0.73185	1503.57	1791.3	-0.960104
YTP-7-G2-061	0.282466	1.20228e-05	0.00152414	2.48348e-05	0.0647053	0.000429202	9342.02	669.293	116.413	297	-10.8275	0.665695	-4.60177	0.684689	1127.06	1438.68	-0.954092
YTP-7-G2-062	0.282453	9.31103e-06	0.0011605	3.85227e-06	0.0446997	0.000204785	11760.7	587.489	114.428	459	-11.2644	0.608913	-1.51453	0.636404	1133.57	1395.94	-0.965045
YTP-7-G2-063	0.282368	2.24481e-05	0.00192398	6.01249e-05	0.0709697	0.00158183	7851.76	585.357	116.405	464	-14.2791	0.944672	-4.66061	0.97829	1279.4	1573.4	-0.942049
YTP-7-G2-066	0.282424	1.32723e-05	0.00116992	8.32094e-06	0.0454996	0.000368015	5679.86	290.698	55.4777	257	-12.2919	0.694695	-6.84772	0.708868	1174.76	1531.4	-0.964761
YTP-7-G2-068	0.282651	1.96101e-05	0.00143971	1.96261e-05	0.0516139	0.000472746	7176.78	406.58	84.8001	236	-4.27166	0.862354	0.688462	0.874774	860.797	1097.32	-0.956635
XJH-G0-01	0.282447	1.07508e-05	0.00158847	1.89083e-06	0.0656827	0.000431489	9974.97	769.428	135.683	835	-11.4765	0.637878	6.09898	0.685923	1155.15	1274.57	-0.952155
XJH-G0-04	0.282408	1.24231e-05	0.000819813	9.52432e-06	0.0324136	0.000160987	7116.71	267.737	48.5514	825	-12.8549	0.674746	4.92824	0.72257	1186.14	1331.17	-0.975307
XJH-G0-07	0.282365	1.00351e-05	0.00117082	2.00841e-05	0.04383	0.00040916	8180.16	411.657	78.8412	804	-14.391	0.623	2.74452	0.675375	1258.27	1434.78	-0.964734
XJH-G0-10	0.282445	1.03854e-05	0.000843548	4.20183e-06	0.0359256	0.000368098	6661.68	281.166	48.1993	826	-11.5494	0.630257	6.24487	0.67897	1135.36	1259.32	-0.974592
XJH-G0-12	0.282394	1.73242e-05	0.0015498	1.51996e-05	0.0569245	0.000341374	6513.11	433.606	84.0275	797	-13.3582	0.798492	3.42728	0.841499	1229.59	1391.58	-0.953319
XJH-G0-13	0.282397	9.18424e-06	0.000760627	3.78595e-06	0.0319071	0.000297164	7968.18	300.425	52.1948	935	-13.2474	0.606414	6.96876	0.663322	1199.73	1306.64	-0.97709
XJH-G0-14	0.282401	1.11542e-05	0.000667879	3.47265e-06	0.0274365	0.000212855	8013.3	258.543	45.5884	819	-13.1299	0.646414	4.60521	0.693487	1192.2	1344.2	-0.979883
XJH-G0-17	0.282322	1.40578e-05	0.000950674	4.48011e-06	0.0397505	0.00044473	5946.26	278.875	48.2283	832	-15.8999	0.713625	1.95745	0.758055	1310.54	1500.4	-0.971365
XJH-G0-19	0.282281	2.3857e-05	0.00229854	7.15928e-05	0.0853621	0.00270626	3390.57	309.288	61.1904	689	-17.3695	0.98683	-3.22613	1.0408	1418.93	1671.94	-0.930767
XJH-G0-20	0.282503	9.45954e-06	0.00145798	1.92772e-06	0.062113	0.000452437	8283.26	605.39	103.486	807	-9.51402	0.611844	7.54029	0.659941	1072.31	1172.56	-0.956085
XJH-G0-27	0.282436	1.29736e-05	0.00134315	1.61313e-05	0.0544286	0.00124042	5645.14	366.693	65.3976	869	-11.8885	0.687616	6.55125	0.739787	1164.06	1276.82	-0.959544
XJH-G0-28	0.282412	1.18514e-05	0.00106841	2.86068e-06	0.0442996	0.000396753	7314.4	381.303	66.9277	828	-12.7258	0.661764	4.98569	0.708248	1188.82	1330.4	-0.967819
XJH-G0-29	0.282599	1.28583e-05	0.00340977	0.000114293	0.13769	0.00474636	7475.86	1217.85	220.399	803	-6.12022	0.685124	9.81035	0.767673	987.466	1043.78	-0.897296
XJH-G0-30	0.282441	1.15167e-05	0.000906408	1.34436e-06	0.0380642	0.000445722	5838.81	264.571	45.3439	848	-11.7066	0.654374	6.53042	0.701975	1143.46	1261.16	-0.972699
XJH-G0-47	0.282413	1.09764e-05	0.000924804	1.42837e-06	0.0358631	0.000151365	6376.63	268.269	50.5355	825	-12.6907	0.642616	5.03508	0.689635	1182.93	1325.28	-0.972144
XJH-G0-58	0.282404	1.55077e-05	0.00100637	8.74061e-06	0.0397675	0.000530165	5217.2	249.256	45.1165	826	-13.0152	0.750348	4.68676	0.794346	1198.33	1345.29	-0.969688
XJH-G0-63	0.282389	1.12014e-05	0.00108508	1.22363e-05	0.0431494	0.000272292	8149.66	409.492	75.0496	768	-13.5546	0.647417	2.8521	0.694011	1222.24	1400.19	-0.967317
