# Supplementary material for: Provenance and tectonic settings of Late Triassic–Jurassic deposits in the southwestern margin of the Yangtze Block: Evidence from whole-rock elemental compositions and detrital zircon U‒Pb ages and Hf isotopes, SW China
Source: Research Square preprint supplement (doi:10.21203/rs.3.rs-5860486/v1), 2025-04-24
Supplement: Supplementary file 2 [file 845f43be67a97ac1a060af0a.xlsx]

## Sheet: XJH-Z1
	Pb	Th	U	Pb	Th/U	207Pb/206Pb	207Pb/206Pb	207Pb/235U	207Pb/235U	206Pb/238U	206Pb/238U		208Pb/232Th	208Pb/232Th	238U/232Th		207Pb/206Pb	207Pb/206Pb	207Pb/235U	207Pb/235U	206Pb/238U	206Pb/238U
	Total	232	238	Common Pb		Ratio	1sigma	Ratio	1sigma	Ratio	1sigma	rho	Ratio	1sigma	Ratio		Age (Ma)	1sigma	Age (Ma)	1sigma	Age (Ma)	1sigma	Concordance
XJH-G0-01	142.473	247.265	378.098	8.25416	0.653971	0.0686798	0.00256988	1.35596	0.0555375	0.141832	0.00225337	0.387899	0.0399979	0.00255109	1.63268		900	77.775	870.13	23.9431	855.014	12.7302	98%
XJH-G0-02	47.3818	91.9487	129.934	9.50139	0.707655	0.0662675	0.00377992	1.27138	0.0728101	0.13942	0.00219463	0.274865	0.0354856	0.00232077	1.51497		816.665	115.735	833.006	32.5535	841.382	12.4247	98%
XJH-G0-03	81.5313	140.076	227.986	2.63916	0.614406	0.0697447	0.00287805	1.32865	0.0563145	0.137414	0.00192408	0.330355	0.0385759	0.00234849	1.73244		920.37	84.105	858.29	24.5623	830.024	10.9141	96%
XJH-G0-04	62.9256	119.201	182.559	7.87177	0.652945	0.065496	0.00324572	1.23911	0.0658486	0.136487	0.00249425	0.343884	0.0360732	0.00217198	1.61834		790.74	108.328	818.478	29.8659	824.766	14.155	99%
XJH-G0-05	86.1902	141.914	251.124	0	0.565115	0.0649113	0.00281807	1.22582	0.0530046	0.138345	0.00213742	0.357307	0.0395566	0.00225231	1.89485		772.225	92.5825	812.436	24.1861	835.298	12.1126	97%
XJH-G0-06	89.4243	155.857	278.211	0	0.56021	0.0717467	0.00283402	1.28794	0.0514854	0.131166	0.00201545	0.384381	0.035584	0.0019826	1.87347		988.89	80.71	840.386	22.8562	794.516	11.4939	94%
XJH-G0-07	78.8337	143.495	224.942	5.78313	0.637918	0.0650251	0.00280375	1.19775	0.0550765	0.132802	0.00214619	0.351449	0.0349598	0.0018542	1.64219		775.93	90.7325	799.546	25.4517	803.832	12.221	99%
XJH-G0-08	50.645	101.085	132.073	10.2161	0.765368	0.0699991	0.00366903	1.28175	0.065918	0.133878	0.00243462	0.353609	0.0335681	0.00191427	1.42881		927.775	107.873	837.635	29.3391	809.951	13.8484	96%
XJH-G0-09	66.0972	134.086	159.291	0	0.841765	0.0688775	0.00314405	1.28727	0.0622153	0.13653	0.00247623	0.375264	0.0336134	0.0018445	1.24271		894.445	94.445	840.088	27.6249	825.012	14.0523	98%
XJH-G0-10	29.7118	55.4626	63.5027	2.15437	0.87339	0.0726205	0.00509724	1.34512	0.0927336	0.136775	0.00289803	0.30734	0.0399126	0.00230426	1.21836		1003.39	143.06	865.447	40.1559	826.4	16.4402	95%
XJH-G0-11	98.0158	172.983	262.409	6.17921	0.65921	0.0735166	0.00282955	1.40087	0.0571483	0.137427	0.00206002	0.367447	0.0346587	0.00181003	1.78821		1027.78	77.78	889.303	24.1769	830.097	11.6839	93%
XJH-G0-12	79.0245	152.989	207.192	9.25013	0.738392	0.0733798	0.00306029	1.33206	0.0589515	0.131607	0.00263552	0.452497	0.0338198	0.0019906	1.43309		1033.34	83.7975	859.776	25.6743	797.024	15.0199	92%
XJH-G0-13	29.9036	46.4436	76.403	9.99664	0.607876	0.0658066	0.00384571	1.40946	0.0856449	0.156114	0.00349797	0.368744	0.0359974	0.00236337	1.72469		1200	122.987	892.93	36.0972	935.144	19.511	95%
XJH-G0-14	32.8467	65.3725	79.9691	13.8038	0.817471	0.0681158	0.00481115	1.26392	0.0887595	0.13542	0.0024008	0.25245	0.0313792	0.00187552	1.28458		872.215	147.37	829.667	39.8132	818.713	13.6378	98%
XJH-G0-15	84.3671	152.426	255.027	0	0.597686	0.0635672	0.00272123	1.14619	0.0493635	0.131321	0.0019965	0.35301	0.0307278	0.00183411	1.8045		727.785	90.7325	775.442	23.3603	795.396	11.3844	97%
XJH-G0-17	45.5575	81.7412	132.933	1.91562	0.614905	0.061323	0.00323626	1.16381	0.0631957	0.13782	0.00240304	0.321102	0.0326821	0.00208366	1.77628		650.015	114.797	783.744	29.6598	832.325	13.622	93%
XJH-G0-18	89.8495	229.709	214.137	0	1.07272	0.0715685	0.00341322	1.23827	0.0639867	0.124501	0.00210302	0.326886	0.0248647	0.00143916	0.97474		973.77	130.56	818.097	29.0327	756.419	12.0629	92%
XJH-G0-19	39.0426	112.502	110.77	0	1.01563	0.0660013	0.00474632	1.04671	0.079311	0.11288	0.00283731	0.331727	0.0226369	0.00167175	1.0808		805.555	149.99	727.251	39.3497	689.455	16.4395	94%
XJH-G0-20	122.424	213.895	357.357	0	0.598548	0.0650364	0.00263832	1.19689	0.0539164	0.133297	0.00276483	0.46045	0.032484	0.00180237	1.72371		775.93	85.175	799.148	24.9256	806.644	15.7329	99%
XJH-G0-21	53.5368	90.4728	161.899	0	0.558823	0.0731315	0.00441408	1.36383	0.0814447	0.136311	0.00266735	0.327677	0.0331362	0.00218539	1.89446		1017.59	122.225	873.518	34.9896	823.769	15.1387	94%
XJH-G0-22	26.8877	49.4418	59.2302	0	0.83474	0.0757234	0.00775146	1.42131	0.145226	0.135424	0.00306178	0.221269	0.0354077	0.00249848	1.24718		1087.04	201.39	897.911	60.9042	818.737	17.389	90%
XJH-G0-23	100.797	191.492	242.301	6.42847	0.790307	0.0690737	0.00280352	1.28611	0.0533472	0.135757	0.0021038	0.373601	0.034146	0.00178372	1.34081		901.85	83.335	839.572	23.7012	820.627	11.9491	97%
XJH-G0-24	56.5819	111.152	121.362	0	0.91587	0.0645781	0.00331566	1.25352	0.0633593	0.140661	0.00248898	0.350083	0.0356902	0.00196624	1.14375		761.115	107.397	824.993	28.5537	848.397	14.0739	97%
XJH-G0-25	30.7354	53.202	78.455	0	0.678122	0.0659135	0.00397698	1.27208	0.075808	0.138944	0.0022389	0.270393	0.0363583	0.00228853	1.54372		803.39	125.918	833.322	33.883	838.686	12.6802	99%
XJH-G0-26	91.2219	162.898	254.633	0	0.639738	0.0646375	0.00217046	1.20466	0.0420063	0.135407	0.00220639	0.467296	0.0351158	0.00200918	1.64734		762.66	65.735	802.736	19.3542	818.638	12.5349	98%
XJH-G0-27	103.909	197.338	216.614	13.2024	0.911013	0.0737596	0.00258032	1.47475	0.0584626	0.144302	0.00248737	0.434819	0.0403817	0.002409	1.21736		1035.19	71.4525	920.08	23.9952	868.945	14.0204	94%
XJH-G0-28	62.1717	123.604	146.127	0	0.845867	0.0643522	0.00316415	1.22815	0.0642243	0.137071	0.00213341	0.297632	0.035296	0.00222211	1.26307		753.71	99.065	813.496	29.2727	828.08	12.1032	98%
XJH-G0-29	71.1226	154.992	150.168	6.40487	1.03213	0.0675599	0.0035982	1.22743	0.0675862	0.132668	0.00239538	0.327904	0.03634	0.00235418	1.091		855.24	110.335	813.167	30.8145	803.067	13.6399	98%
XJH-G0-30	37.1814	66.8668	94.7901	0	0.70542	0.0656551	0.00386315	1.27787	0.076196	0.140549	0.00230096	0.274559	0.0374417	0.00257639	1.51748		794.445	90.2725	835.905	33.9699	847.766	13.0131	98%
XJH-G0-31	52.5403	128.22	139.919	0	0.916387	0.064162	0.00521144	1.11147	0.0881074	0.125239	0.0025188	0.25371	0.0292947	0.00230165	1.22826		746.3	172.205	758.882	42.373	760.65	14.4358	99%
XJH-G0-32	78.9874	132.565	208.515	0	0.635759	0.0615902	0.00255272	1.22234	0.0528853	0.144125	0.00253116	0.405917	0.0394926	0.00286597	1.67585		661.125	88.875	810.844	24.1695	867.944	14.2692	93%
XJH-G0-33	28.7235	55.8453	74.9923	0	0.744681	0.0642764	0.00421172	1.20609	0.0773415	0.136391	0.00242155	0.276869	0.0350166	0.00245029	1.43599		750.005	138.877	803.392	35.6017	824.222	13.744	97%
XJH-G0-34	33.7072	65.3948	73.8089	0	0.886001	0.0650959	0.00388383	1.28917	0.0783849	0.143074	0.00262172	0.301373	0.0399142	0.00267753	1.25368		777.47	121.29	840.931	34.773	862.023	14.7926	97%
XJH-G0-35	43.4744	81.6996	114.937	0	0.710819	0.0651691	0.00321542	1.19163	0.0603277	0.133341	0.00229979	0.340682	0.0367244	0.00237333	1.51315		788.89	103.698	796.717	27.9551	806.897	13.0884	98%
XJH-G0-36	19.5574	41.0289	39.9769	0.549329	1.02632	0.0691122	0.00580604	1.29449	0.0980618	0.135876	0.00243655	0.236718	0.0372753	0.00250293	1.04228		901.85	172.99	843.285	43.3992	821.297	13.8352	97%
XJH-G0-37	149.744	262.63	445.225	0	0.589882	0.0654063	0.00220934	1.22053	0.0441855	0.135165	0.00220147	0.449901	0.0367272	0.00212722	1.81671		787.04	70.3625	810.018	20.2122	817.264	12.5096	99%
XJH-G0-38	189.396	549.508	484.497	3.39797	1.13418	0.0666518	0.00224642	1.09056	0.0410464	0.118327	0.00211846	0.475674	0.0275364	0.00161889	0.983598		827.775	71.14	748.774	19.9428	720.925	12.2177	96%
XJH-G0-39	72.7548	144.814	160.098	2.17949	0.904531	0.0709562	0.00329303	1.36932	0.0704867	0.139056	0.00223856	0.312735	0.038285	0.00231988	1.20813		966.665	96.3025	875.872	30.2133	839.323	12.6771	95%
XJH-G0-40	60.4755	119.441	153.509	0	0.778071	0.0587234	0.0028773	1.10683	0.054157	0.137534	0.00216413	0.321588	0.0367004	0.00227789	1.43622		566.7	102.763	756.647	26.106	830.7	12.2723	90%
XJH-G0-41	70.3903	162.452	162.512	3.55576	0.99963	0.063293	0.00314615	1.13846	0.0587377	0.128999	0.0018376	0.276098	0.0325595	0.00202203	1.07091		716.675	105.545	771.779	27.8948	782.155	10.5009	98%
XJH-G0-42	171.278	287.519	498.429	5.55381	0.57685	0.0624627	0.0020795	1.20144	0.0413182	0.139357	0.00207404	0.432764	0.0374686	0.00235083	1.8603		700.01	72.215	801.252	19.0652	841.024	11.7436	95%
XJH-G0-43	67.1771	114.078	214.85	4.69721	0.530967	0.0671455	0.00278518	1.18037	0.0492376	0.127601	0.00198842	0.373573	0.0367213	0.00242824	2.03588		842.59	87.0325	791.486	22.9359	774.164	11.3753	97%
XJH-G0-44	61.6668	107.682	166.975	2.759	0.644897	0.0645373	0.00288709	1.21537	0.0555877	0.136778	0.00237432	0.379537	0.039526	0.00277589	1.69516		761.115	94.435	807.657	25.4837	826.418	13.4716	97%
XJH-G0-45	53.7428	95.8894	143.511	6.57332	0.668169	0.0631222	0.00341539	1.21928	0.0669171	0.139576	0.00231617	0.302361	0.0375597	0.00274974	1.60631		722.23	119.43	809.448	30.6214	842.265	13.1101	96%
XJH-G0-46	32.1241	57.1848	90.0996	0	0.634684	0.06313	0.00361566	1.21891	0.0702064	0.139365	0.00247321	0.308108	0.0389514	0.00314036	1.76052		722.23	122.207	809.276	32.1315	841.069	14.0006	96%
XJH-G0-47	26.5087	50.5463	65.5541	0	0.771063	0.0678815	0.00465047	1.28043	0.0915166	0.136592	0.00252579	0.258719	0.0373744	0.00315218	1.39016		864.81	147.218	837.047	40.7526	825.364	14.3325	98%
XJH-G0-48	156.958	357.006	408.03	2.62288	0.874951	0.0707821	0.00392715	1.12987	0.072151	0.114368	0.00288008	0.394355	0.0338077	0.00306033	1.23789		950.92	114.047	767.694	34.4008	698.067	16.665	90%
XJH-G0-49	38.2503	84.6276	91.0578	0.570738	0.929384	0.071657	0.00438268	1.32009	0.0864395	0.130984	0.00236083	0.275258	0.0312887	0.00258832	1.29742		975.93	120.22	854.554	37.8345	793.475	13.4631	92%
XJH-G0-50	157.284	294.801	438.883	7.51752	0.671708	0.0688133	0.00215844	1.33547	0.0455696	0.139623	0.00213493	0.44811	0.0295558	0.00252792	1.74374		894.445	69.445	861.263	19.8207	842.532	12.085	97%
XJH-G0-51	16.2539	37.1176	39.9105	8.37727	0.930021	0.0742983	0.00743549	1.34241	0.123807	0.13298	0.00250758	0.20446	0.0265153	0.00286235	1.27003		1050.01	201.852	864.272	53.671	804.843	14.2742	92%
XJH-G0-52	208.4	436.419	442.356	1.16552	0.986579	0.0684121	0.00220433	1.3244	0.0446102	0.139718	0.00212689	0.451935	0.0297243	0.00312162	1.20128		881.17	66.665	856.435	19.4961	843.068	12.0386	98%
XJH-G0-53	57.2687	112.845	154.14	6.21408	0.732097	0.074665	0.00854814	1.41839	0.183111	0.134372	0.00221391	0.127624	0.0280468	0.00334518	1.59647		1061.12	233.333	896.687	76.8833	812.76	12.5888	90%
XJH-G0-54	45.1474	101.84	94.2291	6.55703	1.08077	0.0701191	0.0038325	1.34659	0.075655	0.138514	0.00242099	0.311098	0.0268475	0.00353138	1.09826		931.48	111.888	866.085	32.7416	836.256	13.7154	96%
XJH-G0-55	77.4649	147.852	199.674	10.2886	0.740465	0.0680942	0.00279465	1.31257	0.0559208	0.139788	0.00232242	0.389959	0.0280164	0.00404755	1.57918		872.215	85.1825	851.254	24.5601	843.463	13.143	99%
XJH-G0-56	122.755	260.671	249.451	4.58703	1.04498	0.0697188	0.00250608	1.34285	0.0527227	0.138516	0.00220969	0.406314	0.0278812	0.0044039	1.12482		920.37	74.075	864.465	22.8574	836.266	12.5197	96%
XJH-G0-58	19.013	39.8533	42.2626	0	0.942991	0.0717529	0.00549098	1.35487	0.0942202	0.136775	0.00257156	0.270362	0.0253838	0.00487277	1.25085		988.89	156.643	869.663	40.6305	826.399	14.5896	94%
XJH-G0-59	36.779	71.9534	91.8607	0	0.783288	0.0690588	0.00399513	1.29424	0.0734355	0.135958	0.00231234	0.299746	0.0271103	0.00570813	1.5401		901.85	120.368	843.175	32.5061	821.767	13.1297	97%
XJH-G0-60	57.5905	110.101	141.815	0	0.776367	0.0706053	0.00310979	1.36726	0.0638451	0.140422	0.00239114	0.364664	0.024814	0.00562759	1.51656		946.29	90.745	874.988	27.3914	847.05	13.5241	96%
XJH-G0-61	33.4306	59.9809	93.2967	4.03798	0.642905	0.0619892	0.00359924	1.23054	0.071579	0.14558	0.00329193	0.38874	0.0234005	0.00578299	1.94604		672.235	125.907	814.583	32.5889	876.136	18.5304	92%
XJH-G0-62	74.7019	132.306	226.606	7.48211	0.583858	0.0655075	0.00259054	1.27544	0.0558884	0.139971	0.00222665	0.36304	0.0226469	0.00604028	2.08366		790.74	83.325	834.823	24.9458	844.496	12.5997	98%
XJH-G0-63	89.3698	201.935	261.393	0	0.772536	0.0720441	0.00289513	1.25567	0.0528094	0.126441	0.00203538	0.382754	0.0183977	0.00529666	1.53687		987.04	114.972	825.96	23.7786	767.532	11.6555	92%
XJH-G0-64	128.4	261.656	317.472	0	0.824185	0.0685157	0.00251007	1.28888	0.0503389	0.135858	0.00230528	0.434459	0.0211109	0.0065664	1.42299		883.33	80.555	840.802	22.3384	821.198	13.0908	97%
XJH-G0-65	16.4431	29.3964	41.4692	4.80676	0.708873	0.0701114	0.00559373	1.34463	0.0956177	0.140995	0.00292453	0.291689	0.0226409	0.00765625	1.65252		931.48	160.185	865.238	41.413	850.284	16.5294	98%
XJH-G0-66	30.8206	69.395	76.8821	0	0.902616	0.0661905	0.00508735	1.20407	0.0883375	0.132575	0.00269875	0.277466	0.0195429	0.00602076	1.33491		812.96	161.1	802.463	40.6994	802.537	15.3669	99%
XJH-G0-67	92.5869	182.063	219.811	0	0.828272	0.0660488	0.00295793	1.27244	0.0599131	0.139233	0.00238919	0.36444	0.0222558	0.00624876	1.41981		809.26	87.96	833.483	26.7766	840.324	13.527	99%
XJH-G0-68	78.2334	141.019	198.123	0	0.711773	0.065617	0.00298968	1.26466	0.0599923	0.139527	0.0022938	0.346555	0.0239031	0.00612846	1.62745		794.445	96.29	829.997	26.9041	841.99	12.9842	98%
XJH-G0-69	62.7925	137.754	135.128	0	1.01944	0.0679074	0.00389697	1.25998	0.0742721	0.135305	0.00214262	0.268638	0.0229364	0.00534458	1.2065		864.81	123.145	827.899	33.3743	818.06	12.1741	98%
XJH-G0-70	30.2736	55.8368	74.2073	0	0.752443	0.0680479	0.00423584	1.3039	0.0762362	0.138116	0.00240311	0.297586	0.024004	0.00509071	1.55909		870.05	124.998	847.441	33.6041	833.998	13.6189	98%
XJH-G0-71	107.989	183.803	297.261	6.99878	0.618323	0.0687258	0.00266063	1.27895	0.0515228	0.134604	0.00195062	0.359725	0.0250272	0.0047505	1.90882		900	79.6275	836.388	22.9629	814.08	11.0915	97%
XJH-G0-72	13.4666	29.7102	32.0042	7.94151	0.928323	0.0734902	0.00896423	1.29638	0.139606	0.130505	0.00382639	0.272265	0.0215806	0.00402827	1.28254		1027.78	249.225	844.121	61.7319	790.743	21.8232	93%
XJH-G0-73	93.6867	182.786	259.263	0	0.70502	0.0670076	0.00376709	1.20789	0.0708044	0.131698	0.00250315	0.324247	0.0239004	0.00367016	1.67901		838.885	116.66	804.222	32.5667	797.546	14.265	99%
XJH-G0-74	33.9986	74.5758	62.058	5.6364	1.20171	0.0676347	0.00544682	1.23733	0.105271	0.130722	0.00248259	0.223219	0.0250384	0.00343567	0.980692		857.4	168.512	817.673	47.7792	791.984	14.16	96%
XJH-G0-75	13.9317	28.383	28.363	3.48576	1.00071	0.0658369	0.00812437	1.27906	0.18076	0.135549	0.00313882	0.163854	0.0265337	0.00351483	1.18622		1200	260.015	836.433	80.5358	819.442	17.8243	97%
XJH-G0-76	54.0563	103.204	133.809	0	0.771284	0.060033	0.00369654	1.14145	0.0715428	0.13957	0.00309464	0.353761	0.0265188	0.0028464	1.49673		605.575	133.315	773.198	33.9265	842.23	17.5119	91%
XJH-G0-77	32.6241	50.7736	89.3574	0	0.568208	0.0652582	0.00406526	1.30434	0.0842088	0.143117	0.0025175	0.272467	0.0293888	0.00287187	2.15135		783.335	126.845	847.638	37.1101	862.264	14.2047	98%
XJH-G0-78	95.3875	183.907	236.228	6.49011	0.778515	0.0676149	0.00294097	1.27626	0.0581417	0.136564	0.0022991	0.369549	0.0271891	0.00232268	1.48494		857.4	90.735	835.188	25.9418	825.205	13.0477	98%
XJH-G0-79	15.758	25.6314	37.7985	5.57177	0.678105	0.0738936	0.00675634	1.46649	0.124471	0.143684	0.00298605	0.24485	0.03252	0.00295798	1.8402		1038.89	185.185	916.682	51.2449	865.458	16.8375	94%
XJH-G0-80	80.1746	136.59	215.014	4.92715	0.635259	0.0657623	0.00314648	1.22586	0.0556199	0.136282	0.00221768	0.358651	0.0287219	0.00223306	1.85573		798.15	100.767	812.453	25.3784	823.605	12.5893	98%

## Sheet: YTP-1-Z1
	Pb	Th	U	Pb	Th/U	207Pb/206Pb	207Pb/206Pb	207Pb/235U	207Pb/235U	206Pb/238U	206Pb/238U		208Pb/232Th	208Pb/232Th	238U/232Th		207Pb/206Pb	207Pb/206Pb	207Pb/235U	207Pb/235U	206Pb/238U	206Pb/238U
	Total	232	238	Common Pb	0.97479	Ratio	1sigma	Ratio	1sigma	Ratio	1sigma	rho	Ratio	1sigma	Ratio		Age (Ma)	1sigma	Age (Ma)	1sigma	Age (Ma)	1sigma	Concordance
YTP-1001	94.0677	69.1183	150.084	0	0.460529	0.168506	0.00170479	11.1572	0.169416	0.479823	0.00541949	0.743838	0.13261	0.00178897	2.33082		2542.9	17.75	2536.35	14.2545	2526.49	23.6478	99%
YTP-1003	135.44	73.3685	269.182	0.764544	0.272561	0.143905	0.00133111	8.13083	0.12221	0.40987	0.00517293	0.83969	0.117514	0.00188962	4.22691		2275.93	15.74	2245.68	13.6757	2214.33	23.6826	98%
YTP-1004	13.4888	229.323	264.76	0	0.866154	0.0541662	0.001395	0.284445	0.00723365	0.0383794	0.000435406	0.446105	0.0116164	0.000161007	1.27318		388.94	57.4	254.178	5.72098	242.78	2.70624	95%
YTP-1005	138.895	38.4954	346.404	0	0.111129	0.11589	0.000943379	5.61209	0.0769377	0.351322	0.00415825	0.863357	0.09641	0.00136758	9.52463		1894.44	14.815	1917.96	11.8867	1940.91	19.8644	98%
YTP-1006	229.207	293.933	588.891	0.825471	0.499129	0.114102	0.000883331	4.93977	0.0902984	0.313756	0.00518727	0.904428	0.088949	0.00180986	2.15526		1865.74	14.195	1809.08	15.4851	1759.16	25.4709	97%
YTP-1007	117.827	23.5736	193.857	0.559811	0.121603	0.204162	0.00165843	13.8357	0.179682	0.49098	0.00474671	0.744431	0.134422	0.00205235	8.96849		2861.11	13.27	2738.52	12.438	2574.92	20.57	93%
YTP-1008	24.779	66.6668	158.876	0	0.419615	0.0675763	0.000968588	1.21184	0.0206924	0.130097	0.00127453	0.573744	0.0391338	0.000585283	2.55847		857.4	29.63	806.038	9.51499	788.417	7.28274	97%
YTP-1009	12.7918	158	322.758	0.851249	0.489531	0.0529771	0.00120029	0.237227	0.00556226	0.0325693	0.000323919	0.424171	0.0102195	0.000169524	2.24652		327.835	56.475	216.147	4.56727	206.608	2.02533	95%
YTP-1010	15.594	47.2226	92.7578	1.10461	0.509095	0.0666991	0.00126177	1.25268	0.027141	0.13624	0.00147664	0.500244	0.041701	0.000662796	2.11174		827.775	44.5975	824.613	12.2465	823.368	8.38945	99%
YTP-1011	126.513	108.769	332.427	0	0.327198	0.11508	0.00104847	5.01776	0.06697	0.316164	0.00311682	0.738633	0.0898488	0.00108589	3.89973		1881.17	16.82	1822.32	11.3677	1770.97	15.2957	97%
YTP-1012	8.93507	97.4004	224.76	0.528904	0.433352	0.0503447	0.00141211	0.23006	0.00693626	0.0331476	0.000355076	0.355292	0.0103616	0.00020119	2.56908		209.33	64.805	210.248	5.72749	210.218	2.21844	99%
YTP-1013	7.00895	62.2373	80.9152	0.87601	0.769168	0.0539566	0.00146955	0.491474	0.0135491	0.0664871	0.000790328	0.43118	0.0213949	0.000379264	1.40154		368.57	61.105	405.914	9.22828	414.956	4.78241	97%
YTP-1014	5.21642	39.2136	92.2293	0.882977	0.425175	0.0557196	0.00201211	0.364038	0.0133361	0.0475439	0.000593249	0.340612	0.0150999	0.000341098	2.49503		442.64	76.845	315.225	9.92964	299.425	3.65434	94%
YTP-1015	155.186	25.4614	418.876	0.74076	0.0607849	0.113861	0.00092609	5.07474	0.070477	0.322924	0.00334743	0.746411	0.110811	0.0024689	19.0809		1862.04	14.815	1831.89	11.8458	1803.99	16.3406	98%
YTP-1016	52.9935	46.2167	127.648	0.684388	0.362064	0.116374	0.00108529	5.46111	0.0764531	0.340575	0.00382144	0.801496	0.0980711	0.00145424	3.06633		1901.85	16.975	1894.5	12.0837	1889.43	18.4045	99%
YTP-1017	6.65933	67.2514	116.991	0	0.574842	0.0540199	0.00187488	0.345919	0.0131139	0.046476	0.000663153	0.376382	0.014651	0.000291361	1.87662		372.275	77.77	301.647	9.89545	292.85	4.08816	97%
YTP-1018	125.551	125.15	196.254	0.12525	0.637696	0.163316	0.0014045	10.6413	0.143282	0.4727	0.00509954	0.801215	0.133038	0.00171999	1.66109		2490.43	14.9725	2492.32	12.6118	2495.39	22.3627	99%
YTP-1019	31.9502	259.28	874.782	0.8965	0.296394	0.0521981	0.00112187	0.224691	0.00492135	0.0312926	0.000309251	0.451201	0.0104393	0.000197044	3.64376		294.505	49.995	205.806	4.08266	198.633	1.93604	96%
YTP-1020	13.3263	133.183	138.221	0	0.963547	0.0527863	0.00123971	0.50265	0.0115062	0.0694405	0.000651549	0.409891	0.0218712	0.000291759	1.09577		320.43	53.6975	413.495	7.78015	432.784	3.93438	95%
YTP-1021	182.309	66.794	451.724	0	0.147865	0.1141	0.00103935	5.25836	0.0637588	0.334357	0.00289113	0.713129	0.0975988	0.0013379	7.55746		1865.74	16.665	1862.13	10.4217	1859.46	14.0034	99%
YTP-1022	13.1312	70.8988	148.857	0	0.476289	0.0553455	0.00118112	0.543406	0.0130118	0.0712153	0.000860001	0.504325	0.0225923	0.000402163	2.21572		433.38	41.6625	440.668	8.56554	443.473	5.18089	99%
YTP-1023	46.2477	56.5159	68.7899	0.874259	0.821572	0.165389	0.00169492	10.6914	0.135073	0.469355	0.00443088	0.747233	0.131711	0.00159043	1.28769		2522.22	17.28	2496.68	11.8531	2480.73	19.4855	99%
YTP-1024	43.7118	36.457	88.173	0.261672	0.413471	0.156951	0.00169386	8.29375	0.133282	0.382806	0.00438783	0.713264	0.109168	0.00175349	2.56463		2433.33	18.5175	2263.64	14.6428	2089.38	20.4864	91%
YTP-1025	130.28	81.0275	329.797	1.37622	0.245689	0.114707	0.00101699	5.1019	0.0629804	0.322216	0.00271385	0.682285	0.0982369	0.0014662	4.48221		1875.93	16.05	1836.42	10.5543	1800.54	13.2669	98%
YTP-1026	24.2119	154.598	284.922	0	0.542598	0.055132	0.000867275	0.511589	0.00881833	0.0672858	0.00060244	0.519428	0.021375	0.000289182	1.96646		416.715	35.1825	419.517	5.93042	419.783	3.64579	99%
YTP-1027	6.44057	76.0399	161.184	0.417488	0.471758	0.0522813	0.00142922	0.231464	0.00644885	0.0321938	0.000356256	0.397183	0.0105566	0.000226843	2.24549		298.21	65.735	211.407	5.31924	204.264	2.22768	96%
YTP-1028	15.8988	117.808	419.543	1.55812	0.2808	0.0517141	0.00101262	0.228094	0.00445591	0.0320912	0.000309798	0.494163	0.0104947	0.000198174	3.6996		272.285	44.44	208.624	3.68686	203.623	1.93811	97%
YTP-1029	11.6684	138.065	300.285	0.475293	0.45978	0.0503494	0.00125698	0.220658	0.00609494	0.0317905	0.000360095	0.410081	0.0102173	0.000214758	2.48915		209.33	89.8	202.457	5.07184	201.745	2.25244	99%
YTP-1030	16.6265	155.848	280.563	0	0.555483	0.0522576	0.00106928	0.332496	0.00717954	0.0462071	0.00053033	0.531529	0.0153183	0.000245062	1.89186		298.21	46.2925	291.469	5.47452	291.193	3.27152	99%
YTP-1031	8.01054	45.7535	90.1857	0.644673	0.507325	0.0545253	0.0014204	0.524577	0.0145726	0.0699522	0.000856533	0.440773	0.022577	0.000445922	2.07655		394.495	59.2525	428.204	9.70987	435.867	5.16594	98%
YTP-1032	78.8805	102.781	128.49	0	0.79991	0.151304	0.00168287	8.98151	0.127239	0.430633	0.00428446	0.702293	0.118473	0.00144123	1.31684		2360.8	18.36	2336.13	13.0407	2308.57	19.3459	98%
YTP-1033	91.1174	85.1511	147.432	0.617952	0.577561	0.15849	0.00169439	9.95155	0.177562	0.454436	0.005858	0.722465	0.132155	0.00198063	1.84416		2439.81	18.2075	2430.3	16.5456	2414.95	25.9968	99%
YTP-1034	15.5366	65.4189	137.259	1.38351	0.47661	0.0591001	0.00126799	0.730194	0.0168253	0.0898949	0.000974057	0.470246	0.0286758	0.00047344	2.20847		572.255	46.2875	556.667	9.88135	554.916	5.76906	99%
YTP-1035	36.6759	467.38	733.824	0.429072	0.636911	0.0516123	0.000839162	0.271252	0.00522927	0.0381138	0.000321804	0.437966	0.0122207	0.000143845	1.64987		333.39	37.0325	243.694	4.18004	241.131	2.00255	98%
YTP-1036	22.7587	256.021	448.265	0.579224	0.571137	0.0522252	0.000996069	0.284367	0.00606159	0.0395751	0.000350557	0.415554	0.0128042	0.000185589	1.84672		294.505	44.44	254.116	4.79523	250.199	2.178	98%
YTP-1037	38.2116	73.4	83.4828	0	0.879224	0.116644	0.00163066	5.08687	0.0929946	0.316729	0.00305342	0.527341	0.091412	0.00116891	1.20501		1905.25	25.775	1833.92	15.563	1773.74	14.9795	96%
YTP-1038	28.0956	198.555	308.537	0.83103	0.643536	0.055824	0.000995974	0.536982	0.0127506	0.069832	0.000870017	0.52469	0.0213939	0.000319465	1.64395		455.6	38.885	436.433	8.4287	435.143	5.24767	99%
YTP-1039	7.76995	77.9042	125.169	0.677293	0.622391	0.0546823	0.00159659	0.356552	0.0113808	0.0475194	0.000529465	0.349071	0.0152806	0.000255985	1.68993		398.2	66.66	309.637	8.52119	299.274	3.26232	96%
YTP-1040	238.29	171.376	473.009	1.27882	0.36231	0.153524	0.00237561	8.189	0.220163	0.384711	0.0058922	0.569677	0.115339	0.00209475	3.03878		2387.04	27.005	2252.13	24.3762	2098.25	27.4541	92%
YTP-1041	191.063	164.969	316.803	0	0.52073	0.160736	0.00221419	9.97368	0.21611	0.450646	0.00571324	0.585095	0.126307	0.00223836	2.09809		2464.81	23.46	2432.35	20.0648	2398.12	25.4216	98%
YTP-1042	29.4714	322.078	523.021	1.61823	0.615803	0.0570234	0.00121947	0.339828	0.00893914	0.0431812	0.000436897	0.384633	0.0148587	0.000296505	1.7356		500.04	41.6625	297.041	6.7775	272.521	2.70384	91%
YTP-1043	7.98696	83.6394	200.835	0	0.416459	0.0511931	0.00148606	0.227879	0.00694363	0.0325289	0.000355969	0.359137	0.0104628	0.000227315	2.79225		250.065	66.655	208.446	5.74372	206.356	2.22522	98%
YTP-1044	34.9567	336.629	921.781	0.359887	0.365194	0.0504566	0.000811136	0.216165	0.00414748	0.0311564	0.000304396	0.509205	0.00992976	0.000133241	2.88999		216.74	32.4	198.713	3.46539	197.782	1.90597	99%
YTP-1045	24.0807	211.857	609.548	0	0.347564	0.0510359	0.000885975	0.233616	0.00510233	0.0331601	0.000350478	0.483926	0.0109559	0.000182959	3.0915		242.66	36.105	213.179	4.2022	210.296	2.18976	98%
YTP-1046	9.99498	110.396	246.39	1.64521	0.448054	0.0500865	0.00129855	0.226058	0.0059085	0.0330069	0.00039217	0.454583	0.0105496	0.000180664	2.36663		198.23	28.6975	206.939	4.89526	209.34	2.44992	98%
YTP-1047	239.545	142.81	374.416	0.988678	0.381419	0.176755	0.00167611	11.7076	0.135084	0.48087	0.00367368	0.662119	0.135204	0.00142023	2.96233		2633.34	15.74	2581.3	10.9355	2531.05	16.0503	98%
YTP-1048	25.4969	128.595	362.954	0	0.3543	0.054061	0.000837581	0.438676	0.00764447	0.0589403	0.000593184	0.577529	0.0186363	0.000263208	2.97527		372.275	35.1825	369.318	5.40113	369.177	3.61657	99%
YTP-1049	304.384	250.062	752.771	0.429816	0.332189	0.116978	0.00104048	5.57527	0.108699	0.34507	0.0059076	0.878101	0.103384	0.00195793	3.32771		1910.8	16.5175	1912.29	16.8361	1911.02	28.3317	99%
YTP-1050	32.8131	48.6805	53.295	0.593645	0.913415	0.156485	0.00195483	9.16928	0.143651	0.424292	0.00400385	0.60234	0.121613	0.00159084	1.15477		2418.21	20.5225	2355.05	14.4324	2279.93	18.1634	96%
YTP-1051	284.035	126.811	472.252	0.380066	0.268524	0.167514	0.00144349	11.0151	0.141436	0.476166	0.00501701	0.820569	0.136206	0.00188928	4.13999		2533.02	14.5025	2524.41	12.0752	2510.54	21.9512	99%
YTP-1052	7.03437	79.779	117.314	0	0.680045	0.0537083	0.0018238	0.339756	0.012526	0.0457622	0.000513535	0.30438	0.0151295	0.00026856	1.69399		366.72	77.77	296.987	9.49546	288.451	3.16943	97%
YTP-1053	112.684	98.7452	300.634	2.218	0.328457	0.113332	0.00100154	4.7042	0.0635987	0.30028	0.00313183	0.771452	0.104225	0.00165741	3.44268		1853.4	15.2775	1767.99	11.3846	1692.7	15.5536	95%
YTP-1054	55.7821	44.2816	99.2418	0	0.446199	0.150358	0.00141937	8.98993	0.110012	0.432876	0.00400212	0.755515	0.123211	0.00176978	2.48811		2350.31	10.955	2336.98	11.294	2318.67	18.0487	99%
YTP-1055	110.498	103.286	268.451	0.407834	0.384747	0.113903	0.00095798	5.08618	0.0529425	0.323163	0.00243485	0.723835	0.0984986	0.00115585	2.79138		1862.66	15.1225	1833.8	8.9202	1805.16	11.9025	98%
YTP-1056	144.242	102.044	348.546	1.36319	0.29277	0.113091	0.000957673	5.23323	0.0629857	0.334894	0.00327623	0.812819	0.0965392	0.00124881	3.57803		1850.01	14.97	1858.04	10.3378	1862.06	15.8533	99%
YTP-1057	82.045	103.441	415.175	0	0.24915	0.0777996	0.000827671	1.86628	0.0315576	0.173285	0.00218914	0.747111	0.0532776	0.00070866	4.06801		1142.6	21.145	1069.21	11.2029	1030.19	12.0407	96%
YTP-1058	187.774	51.0054	455.718	0.483671	0.111923	0.117315	0.00104889	5.83674	0.0993166	0.358954	0.00475653	0.778756	0.103895	0.0017426	9.07249		1916.66	16.055	1951.88	14.8099	1977.21	22.5886	98%
YTP-1059	43.421	42.1674	69.2084	0	0.609282	0.163887	0.00175891	10.4107	0.15056	0.459307	0.00481383	0.724695	0.126947	0.00187255	1.72823		2495.99	17.13	2472	13.5027	2436.5	21.3055	98%
YTP-1060	16.1908	75.692	281.741	0.575506	0.268659	0.0535692	0.00111491	0.364981	0.00813517	0.0493607	0.000537468	0.488511	0.0151705	0.000285428	3.90711		353.76	46.2925	315.927	6.05541	310.596	3.30602	98%
YTP-1061	120.187	139.051	274.989	0.597077	0.505662	0.112254	0.00116149	5.30592	0.0753902	0.341534	0.00350472	0.722212	0.0978923	0.00135391	2.0784		1836.12	18.5225	1869.82	12.2058	1894.05	16.8721	98%
YTP-1062	166.975	80.362	410.304	0	0.195859	0.112647	0.00104896	5.34924	0.0813893	0.343351	0.00442435	0.846908	0.0949881	0.00134698	5.47389		1842.29	17.7525	1876.77	13.0784	1902.77	21.2562	98%
YTP-1063	15.9626	133.062	176.112	0	0.755553	0.0556927	0.00128875	0.532658	0.0136172	0.0691184	0.000717062	0.405813	0.0210381	0.000288792	1.37817		438.935	56.475	433.572	9.02616	430.842	4.32989	99%
YTP-1064	25.9801	138.445	380.75	0	0.363612	0.0528189	0.000890281	0.415513	0.00763673	0.0569411	0.000539092	0.515126	0.0180726	0.000280089	2.87523		320.43	41.6625	352.837	5.48327	356.996	3.29364	98%
YTP-1065	6.60615	88.6261	166.21	0	0.533218	0.049402	0.00168003	0.220351	0.00775219	0.0323308	0.000360655	0.317078	0.0102008	0.00022382	2.09337		168.6	84.245	202.202	6.45161	205.119	2.25484	98%
YTP-1066	13.2768	86.545	69.5059	0	1.24515	0.0676698	0.00134946	1.20917	0.0276556	0.129104	0.00144405	0.489042	0.0397672	0.000524304	0.834748		857.4	41.205	804.809	12.7229	782.752	8.25536	97%
YTP-1067	119.781	129.056	174.392	0	0.740034	0.162866	0.00140443	11.2772	0.16009	0.500901	0.0060123	0.845528	0.138556	0.00186754	1.43351		2487.03	14.8175	2546.32	13.3529	2617.67	25.8617	97%
YTP-1068	124.726	137.892	287.112	0.0608661	0.480271	0.111999	0.00105992	5.2842	0.0669083	0.341598	0.00348475	0.805667	0.0970891	0.0011837	2.23128		1831.79	16.67	1866.31	10.8851	1894.35	16.7755	98%
YTP-1069	15.5453	53.2433	99.3562	0.291247	0.535883	0.0631974	0.00115033	1.08532	0.0222617	0.124418	0.0014186	0.555869	0.038824	0.000654505	1.97022		716.675	38.885	746.226	10.8515	755.945	8.1432	98%
YTP-1070	88.9831	157.861	148.919	0.190482	1.06005	0.135095	0.00146521	7.72119	0.1142	0.413657	0.00467276	0.763749	0.118067	0.00152093	0.975153		2165.12	19.14	2199.07	13.3798	2231.62	21.3423	98%
YTP-1071	169.389	281.126	386.229	1.46018	0.727875	0.114671	0.00109568	5.08755	0.0680708	0.321165	0.00341074	0.793723	0.102797	0.00190143	1.59886		1875.93	17.2825	1834.03	11.4223	1795.41	16.6704	97%
YTP-1072	7.31981	42.7694	41.7007	0.822037	1.02563	0.0644533	0.00167222	1.09923	0.0289505	0.12391	0.00133941	0.410434	0.0378818	0.000599842	1.01594		766.67	53.7	752.981	14.0125	753.027	7.69321	99%
YTP-1073	14.0435	52.6365	241.757	0	0.217725	0.0500977	0.00109746	0.353806	0.00806459	0.051357	0.000610082	0.52116	0.015873	0.000307758	4.79615		198.23	51.8425	307.58	6.05223	322.847	3.74479	95%
YTP-1074	75.8039	54.277	145.578	0.862562	0.372837	0.140852	0.00144881	7.82495	0.0920963	0.402271	0.00300139	0.633932	0.123187	0.00138296	2.77199		2238.89	17.595	2211.08	10.7026	2179.49	13.8479	98%
YTP-1075	26.9074	488.482	487.077	1.25667	1.00288	0.0523719	0.000816093	0.292623	0.00668597	0.0404012	0.000644466	0.698151	0.0128956	0.000245127	1.06935		301.91	39.81	260.622	5.25496	255.32	3.99555	97%
YTP-1076	21.7086	162.822	288.193	1.18375	0.564975	0.0590065	0.00183554	0.470533	0.0134403	0.0572653	0.000872139	0.53318	0.0188134	0.000423687	1.88219		568.55	68.505	391.557	9.28419	358.973	5.32118	91%
YTP-1077	9.71065	62.7004	127.431	1.19627	0.492034	0.0587133	0.00164735	0.487117	0.014091	0.0600724	0.000536526	0.308751	0.0198611	0.000365233	2.1367		566.7	61.1	402.944	9.62502	376.066	3.26898	93%
YTP-1078	41.6731	42.1013	61.6567	0.837929	0.682834	0.166919	0.00178594	11.2932	0.184052	0.489608	0.00619697	0.776614	0.138611	0.00195282	1.54127		2526.85	18.67	2547.64	15.3006	2568.98	26.8538	99%
YTP-1079	150.806	94.9625	355.275	0.574509	0.267293	0.11331	0.00105284	5.46993	0.0749239	0.349583	0.00390624	0.815775	0.0996872	0.00140765	3.89105		1853.71	16.9725	1895.89	11.8289	1932.61	18.6877	98%
YTP-1080	55.5772	84.7319	76.5699	0	1.1066	0.166417	0.00185612	11.1104	0.165571	0.48307	0.00493645	0.685724	0.13646	0.0016749	0.9743		2521.91	18.8275	2532.43	13.9885	2540.62	21.5009	99%
YTP-1081	42.6693	198.433	258.666	0.514881	0.767142	0.0643271	0.000999705	1.11689	0.0189069	0.126037	0.00102959	0.482567	0.0387408	0.000503217	1.34619		753.71	32.25	761.486	9.0836	765.219	5.90874	99%
YTP-1082	59.4879	75.8887	85.7764	0.0183181	0.884728	0.16684	0.00206676	11.3484	0.183817	0.49307	0.00509901	0.638451	0.135682	0.00177431	1.16061		2527.78	20.6775	2552.2	15.2141	2583.94	22.0594	98%
YTP-1083	19.186	63.4955	119.851	0	0.529789	0.0655139	0.00131129	1.17738	0.0256733	0.130406	0.00124255	0.436969	0.0402703	0.000572973	1.93974		790.74	40.7375	790.093	11.9843	790.182	7.09877	99%
YTP-1084	52.924	29.8384	119.832	0.221083	0.249001	0.128666	0.00156974	6.3756	0.10043	0.358761	0.00333508	0.590143	0.128842	0.00260396	4.17933		2079.93	21.7625	2028.91	13.8947	1976.3	15.8587	97%
YTP-1085	52.7188	91.2208	149.541	0	0.610003	0.0990508	0.00123389	3.75359	0.053677	0.274817	0.00242547	0.617176	0.0801729	0.000981171	1.68693		1606.48	22.9925	1582.88	11.516	1565.21	12.294	98%
YTP-1086	53.0915	93.614	285.027	0.120432	0.32844	0.0705211	0.00100122	1.54874	0.0253818	0.159219	0.00156332	0.599115	0.0490146	0.000745325	3.1724		942.59	28.8625	949.992	10.1324	952.436	8.70884	99%

## Sheet: YTP-7-Z1
	Pb	Th	U	Pb	Th/U	207Pb/206Pb	207Pb/206Pb	207Pb/235U	207Pb/235U	206Pb/238U	206Pb/238U		208Pb/232Th	208Pb/232Th	238U/232Th		207Pb/206Pb	207Pb/206Pb	207Pb/235U	207Pb/235U	206Pb/238U	206Pb/238U
	Total	232	238	Common Pb		Ratio	1sigma	Ratio	1sigma	Ratio	1sigma	rho	Ratio	1sigma	Ratio		Age (Ma)	1sigma	Age (Ma)	1sigma	Age (Ma)	1sigma	Concordance
YTP-7001	38.1459	158.483	486.491	0.568819	0.325767	0.0618651	0.00101945	0.557077	0.0116853	0.0652007	0.000919825	0.672553	0.0240698	0.000410405	3.27221		1132.41	36.885	953.354	9.66879	889.398	12.9138	93%
YTP-7002	42.7789	98.5728	207.445	0.70746	0.475177	0.0712815	0.000922548	1.64526	0.0258306	0.167089	0.00151257	0.576591	0.0505626	0.000673795	2.24668		455.6	31.48	433.924	6.39081	430.151	4.49445	99%
YTP-7003	31.6776	424.69	453.617	0	0.936229	0.0528712	0.000873115	0.381539	0.00688793	0.0523873	0.000529075	0.559424	0.0162903	0.00021432	1.23362		353.76	35.18	222.524	3.51518	209.351	1.80964	93%
YTP-7004	27.5892	119.711	329.333	0	0.363495	0.056282	0.000933168	0.566198	0.0137841	0.0725457	0.00102624	0.581067	0.0225763	0.000501156	2.93965		794.445	40.735	760.977	12.1058	750.587	11.7946	98%
YTP-7005	225.21	243.78	332.627	0	0.732892	0.167676	0.00148308	11.3456	0.14927	0.490359	0.00492411	0.763255	0.135292	0.00161179	1.42102		838.885	24.0725	868.766	8.08028	879.916	8.37063	98%
YTP-7006	68.4291	569.1	805.513	1.21894	0.706506	0.0556871	0.000703407	0.520518	0.00923016	0.0677005	0.0008067	0.671966	0.0207966	0.000323686	1.67377		390.79	44.44	437.236	7.90634	444.653	4.20478	98%
YTP-7008	10.4927	113.4	160.435	0.411995	0.706833	0.0535998	0.00139335	0.369298	0.0106302	0.0499058	0.000594537	0.413871	0.0163993	0.00026399	1.48516		431.53	46.2925	267.23	6.85213	246.598	3.85701	91%
YTP-7009	51.7429	45.0587	290.354	1.05811	0.155185	0.069624	0.000912977	1.49327	0.023975	0.155524	0.00147983	0.592645	0.0459261	0.000776704	6.71609		477.82	80.5475	284.105	9.79463	263.151	3.11844	92%
YTP-7010	32.7349	181.461	193.547	0.993719	0.937555	0.0653077	0.00109001	1.11041	0.0219334	0.123322	0.00130268	0.534778	0.0381784	0.00051494	1.10948		883.33	39.97	817.262	11.3118	793.076	6.31718	96%
YTP-7011	5.64416	57.3136	81.6383	0.267833	0.702042	0.0601203	0.00235742	0.445078	0.0184751	0.0539677	0.000777753	0.347181	0.0167874	0.000370914	1.49953		1861.12	20.68	1751.07	12.7446	1661.92	16.4617	94%
YTP-7012	49.2321	94.8577	171.119	0	0.554337	0.0850828	0.00112941	2.6397	0.0404704	0.225268	0.00215119	0.622869	0.0663259	0.000875493	1.91307		564.85	66.655	496.825	15.6459	481.697	12.5249	96%
YTP-7013	30.1179	156.038	162.768	0.0097999	0.958649	0.0663265	0.00112832	1.21671	0.0226162	0.133255	0.00127902	0.516372	0.0404798	0.000517587	1.09721		2495.99	16.9775	2605.22	12.6916	2746.65	21.2449	94%
YTP-7014	13.1819	221.877	185.771	1.73939	1.19436	0.0544868	0.00136233	0.365553	0.00913246	0.0487644	0.000462661	0.379771	0.0150676	0.000211187	0.894345		368.57	42.59	425.65	7.14498	437.094	4.22463	97%
YTP-7015	10.4167	99.8146	258.217	0.57304	0.386554	0.0514789	0.0014	0.24031	0.00711274	0.0338178	0.000414983	0.41459	0.0107483	0.000226784	2.72605		655.57	27.775	465.801	6.08399	431.266	5.83701	92%
YTP-7016	46.964	213.509	252.045	1.41928	0.847104	0.0744352	0.00110969	1.39028	0.0206228	0.13567	0.00109565	0.544432	0.0383502	0.000423183	1.82753		235.25	38.88	302.388	5.26407	311.27	3.61773	97%
YTP-7017	315.094	267.555	545.636	1.00646	0.490354	0.150722	0.00137041	9.20742	0.132563	0.442543	0.00516964	0.811374	0.120922	0.00157416	2.10056		687.05	36.1075	473.075	6.29544	433.977	4.8832	91%
YTP-7018	107.438	149.283	158.966	0	0.93909	0.163295	0.00172805	10.3718	0.137731	0.460273	0.00434681	0.711179	0.127247	0.00155534	1.18774		901.85	24.0725	839.548	9.61951	816.006	10.1435	97%
YTP-7019	23.7087	124.636	281.82	0.831655	0.442254	0.0549149	0.000997538	0.5245	0.0108132	0.0691756	0.000697172	0.488853	0.0219441	0.000374951	2.43489		375.98	66.66	315.699	7.86336	309.303	3.32642	97%
YTP-7020	17.0743	48.6633	38.8672	0.322764	1.25204	0.113337	0.0021444	4.56007	0.105265	0.293187	0.00516631	0.763353	0.0790406	0.0020999	0.854114		683.345	41.815	485.831	11.6199	439.993	6.89263	90%
YTP-7021	34.7089	271.118	662.151	0.667144	0.40945	0.0525118	0.000838746	0.315688	0.00562277	0.0435622	0.000426623	0.549847	0.0136985	0.000224005	2.68791		375.98	37.0325	433.034	6.44384	443.843	4.3256	97%
YTP-7022	34.1184	197.138	375.543	1.05458	0.524939	0.0559306	0.000946613	0.56656	0.0118429	0.0732431	0.000794579	0.518991	0.0232515	0.000320523	1.97551		901.85	61.1125	883.169	11.2773	875.973	9.08297	99%
YTP-7023	20.5591	86.1751	113.552	0.218671	0.758906	0.0659637	0.00113537	1.22389	0.0229929	0.134494	0.00126386	0.500199	0.0409697	0.000573132	1.43252		331.54	52.7725	262.448	5.95014	253.904	3.20663	96%
YTP-7024	17.2249	212.783	318.101	0.932021	0.668918	0.056749	0.00153033	0.325105	0.00732219	0.0419528	0.000479859	0.50785	0.0126345	0.000260326	1.67948		420.42	52.7725	450.709	8.84244	456.947	5.13624	98%
YTP-7025	336.675	273.084	573.353	0	0.476293	0.148127	0.00198168	9.1314	0.14541	0.446099	0.0036457	0.513206	0.132567	0.00213467	3.02362		1188.58	39.81	1075.63	11.6987	1022.25	7.1693	94%
YTP-7027	60.7934	145.514	306.65	0.533963	0.474527	0.074841	0.000976562	1.61963	0.0287445	0.157346	0.002333	0.835446	0.0436812	0.00112134	2.31609		609.28	56.3175	430.178	8.28249	399.245	3.47266	92%
YTP-7028	13.6652	74.5603	82.1955	0.524299	0.90711	0.0638215	0.0015069	1.08697	0.0273262	0.123681	0.00127591	0.410351	0.0370274	0.000545055	1.15153		257.47	40.735	242.127	4.18477	240.276	2.25605	99%
YTP-7029	59.3287	319.525	343.286	0.894318	0.930782	0.0641354	0.000949871	1.1253	0.0183865	0.127496	0.00128027	0.614574	0.0386837	0.000498925	1.12965		1043.53	29.6325	1110.69	12.6782	1143.68	12.7795	97%
YTP-7030	168.303	184.569	366.538	0.436119	0.503546	0.152978	0.00165287	7.75558	0.163108	0.36734	0.00660701	0.855215	0.103765	0.00196802	2.18547		2462.03	18.5175	2511.77	14.2684	2570.33	24.1528	97%
YTP-7031	154.799	68.408	389.975	0.0663869	0.175416	0.113781	0.00135202	5.41764	0.086369	0.345539	0.00411507	0.747021	0.0979352	0.0016975	6.24469		733.34	35.1825	449.622	7.62624	407.176	5.57096	90%
YTP-7032	31.6666	351.775	544.224	0	0.646379	0.0527888	0.000926428	0.341641	0.00662355	0.0470724	0.000578004	0.63335	0.0137309	0.000293762	1.97188		964.81	25.9275	987.735	9.9378	996.05	8.37196	99%
YTP-7033	24.3806	183.655	260.432	0	0.705195	0.0548219	0.00101223	0.557309	0.0110207	0.0738679	0.000743125	0.508738	0.0224807	0.000313517	1.45693		324.13	37.0325	328.17	5.06731	329.162	3.24573	99%
YTP-7034	44.7499	250.853	496.07	1.3156	0.505681	0.0561514	0.000836649	0.577688	0.0100943	0.0747089	0.000808963	0.619689	0.0229604	0.000329342	2.07772		464.86	35.1825	455.553	8.94173	451.474	6.17289	99%
YTP-7035	17.9283	152.757	190.588	0	0.801508	0.0556027	0.0011873	0.554688	0.0129133	0.0725439	0.000861056	0.50985	0.021938	0.00032155	1.29284		2534.87	14.8125	2551.97	12.3989	2572.23	21.344	99%
YTP-7036	30.1778	215.097	555.527	1.8204	0.387194	0.051613	0.000932208	0.331781	0.0065915	0.0466914	0.000488868	0.527014	0.0146742	0.000252586	2.73093		438.935	32.405	425.497	6.17058	422.287	4.87592	99%
YTP-7037	22.5184	200.42	469.162	0.587018	0.427186	0.0504967	0.000921838	0.283299	0.00568255	0.0407217	0.000413778	0.506574	0.0123643	0.000181284	2.41942		353.76	59.2525	319.133	7.88564	313.943	3.65439	98%
YTP-7038	64.1479	183.599	536.392	0	0.342286	0.0605889	0.000705075	0.849251	0.0115765	0.101579	0.000835576	0.603448	0.0307569	0.000371339	3.07802		916.665	22.065	927.648	9.78416	931.854	8.27098	99%
YTP-7039	27.1135	257.069	601.687	0	0.427247	0.0509481	0.000923352	0.262556	0.00513843	0.0373509	0.000312151	0.427028	0.011764	0.000179772	2.41506		783.335	35.1825	758.37	10.5654	749.658	7.48666	98%
YTP-7040	28.1349	124.639	159.324	0	0.782299	0.0643518	0.00106361	1.20619	0.0211363	0.136318	0.00155769	0.652101	0.0409254	0.000600577	1.34626		609.28	89.8	373.827	12.984	338.835	4.76051	90%
YTP-7041	337.824	352.912	613.439	1.95768	0.575301	0.157973	0.00168988	8.97801	0.12776	0.411719	0.00439195	0.749622	0.115651	0.0016807	2.02419		1317.59	25.4625	1311.77	11.3254	1309.65	11.34	99%
YTP-7042	79.817	157.205	434.83	2.14136	0.361533	0.0774387	0.00161753	1.55719	0.0242956	0.147939	0.00229803	0.995608	0.0507672	0.000855232	2.87763		816.665	31.325	808.271	10.3741	806.409	7.2886	99%
YTP-7043	50.7232	387.909	585.051	0.0989443	0.663034	0.0558113	0.000831304	0.533189	0.00963959	0.0690038	0.000744315	0.596632	0.0210429	0.000299786	1.60421		390.79	55.55	316.352	6.79402	306.931	2.84865	96%
YTP-7044	38.7915	142.184	1029.37	0.660807	0.138127	0.053621	0.000828059	0.245021	0.00430617	0.0330086	0.000289421	0.498901	0.0113734	0.000211485	7.48776		261.175	62.95	218.674	5.82476	214.399	2.59023	98%
YTP-7046	14.4112	70.2518	92.4777	0.503721	0.759661	0.0656342	0.00124023	1.11583	0.0252028	0.123484	0.00205435	0.736571	0.0333759	0.000865795	1.40032		1053.71	25	884.817	8.78112	820.134	6.23501	92%
YTP-7047	90.2396	320.537	473.171	1.11908	0.677424	0.0670006	0.000780645	1.3528	0.0186731	0.146251	0.001486	0.736096	0.0444255	0.000567868	1.52528		2354.02	15.4275	2358.85	13.2839	2362.01	23.1372	99%
YTP-7048	17.9514	110.121	202.86	0	0.542844	0.0545094	0.00110106	0.538198	0.0119688	0.0714114	0.000697705	0.439335	0.0221676	0.000333356	1.91375		2489.82	18.675	2468.54	12.4119	2440.77	19.2343	98%
YTP-7049	31.8139	271.896	686.371	0.761543	0.396136	0.0554717	0.00116162	0.301063	0.0087769	0.0389946	0.000621279	0.546509	0.0137522	0.000402816	2.6987		409.31	40.7375	428.153	7.20795	431.187	4.20993	99%
YTP-7050	5.21319	63.0813	99.0886	0	0.636615	0.0563741	0.00215447	0.322867	0.0127582	0.041666	0.00050338	0.305737	0.0127005	0.000341992	1.75057		1853.4	33.49	1742	19.26	1657.43	25.7691	95%
YTP-7051	27.3024	187.5	136.349	0.304136	1.37515	0.0685187	0.00132236	1.23643	0.0248847	0.130914	0.00110569	0.419649	0.0396313	0.000496165	0.764884		309.32	4.63	278.58	4.34351	274.875	2.63956	98%
YTP-7052	105.195	184.394	267.627	0	0.688994	0.113697	0.00128704	4.60993	0.0701049	0.294087	0.00329969	0.737808	0.0874025	0.00163554	1.55599		450.045	37.035	455.787	7.68233	455.665	4.77897	99%
YTP-7053	8.79012	66.0489	86.0051	0.302853	0.767965	0.0588903	0.00178197	0.631171	0.0251287	0.0775858	0.00209321	0.677655	0.0230906	0.00045786	1.42599		805.555	37.035	811.552	10.5126	813.452	7.19491	99%
YTP-7054	91.3615	109.977	120.814	0	0.910303	0.163892	0.00165542	12.0104	0.161029	0.531235	0.00503405	0.70678	0.134257	0.00165653	1.19763		483.375	59.2525	285.822	5.61411	264.926	2.97227	92%
YTP-7055	20.9831	247.368	211.126	0	1.17166	0.0539182	0.0010549	0.520747	0.0106923	0.0701557	0.000700226	0.486105	0.0216469	0.000251489	0.887294		2324.39	22.8425	2351.26	14.6607	2377.89	16.3024	98%
YTP-7056	83.2577	405.215	1037.64	2.54074	0.390515	0.0612338	0.000786437	0.582086	0.00946672	0.0691887	0.000967344	0.859674	0.0209379	0.000306163	2.72803		1064.82	30.5525	977.847	11.1614	942.011	13.0047	96%
YTP-7057	27.1647	234.922	453.487	0.412499	0.518035	0.0508406	0.000855108	0.346902	0.00697744	0.0494705	0.000588326	0.591266	0.015804	0.000274223	2.03035		744.45	49.995	747.03	13.3048	751.717	7.331	99%
YTP-7058	50.5156	608.319	520.507	1.9923	1.1687	0.0623591	0.00118723	0.59346	0.00986665	0.0696384	0.000809325	0.69903	0.0199152	0.000390953	0.983968		746.3	26.85	765.509	8.79973	773.566	7.3318	98%
YTP-7059	112.485	570.081	637.74	2.37406	0.893908	0.06914	0.000801653	1.28606	0.0216194	0.134944	0.00178417	0.786501	0.0407962	0.000625717	1.20634		2379.32	18.5175	2203.07	18.9749	2016.87	31.1682	91%
YTP-7060	8.87344	136.755	129.715	0.380582	1.05427	0.0541516	0.00157671	0.364674	0.0105644	0.0491503	0.00054069	0.379736	0.0158411	0.000270932	1.04037		1861.12	22.0675	1887.65	13.7252	1913.26	19.7422	98%
YTP-7061	46.24	389.685	488.592	1.84587	0.797567	0.062278	0.00123565	0.613604	0.0184584	0.0706371	0.00114406	0.538408	0.0236538	0.000571413	1.32028		320.43	43.515	298.414	5.01695	296.523	3.56215	99%
YTP-7062	28.2811	122.22	339.635	0	0.359856	0.0541526	0.000885232	0.531846	0.00971127	0.0712767	0.000717732	0.551473	0.0222142	0.000343356	2.82599		405.605	45.365	449.774	7.19211	459.417	4.46786	97%
YTP-7063	30.79	118.708	164.455	1.05881	0.72183	0.0690608	0.00111899	1.38641	0.0264669	0.145551	0.00161189	0.580106	0.0459624	0.000660764	1.44507		457.45	33.33	462.975	6.5042	464.463	4.85887	99%
YTP-7064	17.3259	273.102	328.947	0	0.830229	0.0530562	0.00111047	0.29495	0.00758499	0.0401729	0.000516939	0.50038	0.0129372	0.000218048	1.23603		435.23	48.1425	448.063	8.4393	451.464	5.18102	99%
YTP-7065	15.2471	101.445	166.667	1.87791	0.608669	0.0552224	0.00123644	0.558744	0.0135661	0.0734566	0.000854298	0.479	0.0231567	0.000430153	1.70475		333.39	37.96	290.925	5.02942	294.177	3.01505	98%
YTP-7066	26.5321	94.6646	112.752	0	0.839586	0.0796567	0.00142634	1.88445	0.033168	0.171842	0.00129938	0.429607	0.0545187	0.000808087	1.27731		216.74	42.5825	253.271	4.4995	257.305	2.56678	98%
YTP-7067	23.0508	269.09	254.983	0	1.05532	0.060128	0.00154503	0.527543	0.0124524	0.063891	0.000572009	0.379287	0.0194508	0.000285523	1.02323		633.35	25.9225	624.238	6.37057	623.656	4.90135	99%
YTP-7068	23.514	177.645	522.373	1.02517	0.340074	0.0514105	0.000910902	0.269291	0.00522717	0.0379762	0.000362658	0.491974	0.0119789	0.000225986	3.08196		238.955	42.5825	236.725	4.1356	236.392	1.944	99%
YTP-7069	29.6564	135.811	107.037	0.858466	1.26883	0.0740795	0.00108226	1.98579	0.0372147	0.194124	0.00236449	0.649946	0.0556581	0.000706639	0.822943		753.71	35.1825	803.437	9.74316	823.808	8.84809	97%
YTP-7070	169.009	248.038	239.432	1.3678	1.03594	0.160605	0.00176256	10.8665	0.165552	0.48992	0.00557307	0.746661	0.14071	0.00214879	0.993672		2435.18	18.5175	2335.77	13.0978	2222.78	20.0911	95%
YTP-7071	26.7189	108.644	159.455	1.50102	0.68135	0.0671476	0.00125712	1.21596	0.022637	0.131783	0.00172972	0.705047	0.0402668	0.000539647	1.51591		842.59	-159.722	807.927	10.3871	798.026	9.86154	98%
YTP-7072	125.516	84.3585	319.335	0	0.264169	0.11686	0.00140187	5.39738	0.0825666	0.33417	0.00374466	0.732527	0.0843832	0.00144964	3.73869		1909.26	22.07	1884.44	13.1674	1858.56	18.1212	98%
YTP-7073	21.1047	168.325	237.281	0.751823	0.709389	0.0603535	0.00135533	0.578939	0.0139959	0.0694127	0.000722034	0.430279	0.0224885	0.000358081	1.50426		616.685	48.14	463.779	9.006	432.616	4.35868	93%
YTP-7074	149.586	108.661	359.9	4.9994	0.30192	0.129796	0.00407793	6.14283	0.223255	0.339842	0.00306636	0.248264	0.12148	0.00618369	3.37017		2095.37	55.4025	1996.35	31.7656	1885.91	14.7884	94%
YTP-7075	76.8418	727.241	1222.32	1.45356	0.594966	0.0574626	0.00072208	0.403006	0.00651066	0.0507642	0.000624351	0.761303	0.0172287	0.00019827	1.7391		509.3	60.1775	343.826	4.71769	319.212	3.83425	92%

## Sheet: YTP-27-Z1
	Pb	Th	U	Pb	Th/U	207Pb/206Pb	207Pb/206Pb	207Pb/235U	207Pb/235U	206Pb/238U	206Pb/238U		208Pb/232Th	208Pb/232Th	238U/232Th		207Pb/206Pb	207Pb/206Pb	207Pb/235U	207Pb/235U	206Pb/238U	206Pb/238U
	Total	232	238	Common Pb		Ratio	1sigma	Ratio	1sigma	Ratio	1sigma	rho	Ratio	1sigma	Ratio		Age (Ma)	1sigma	Age (Ma)	1sigma	Age (Ma)	1sigma	Concordance
YTP-27001	35.3884	28.0823	53.4816	0	0.525084	0.168457	0.00237132	11.2179	0.2207	0.482229	0.00627561	0.66147	0.137338	0.00212281	2.03817		2542.28	22.6825	2541.4	18.4229	2536.97	27.3279	99%
YTP-27002	20.1279	167.903	229.114	0	0.732835	0.0575084	0.00122422	0.516035	0.011843	0.0651026	0.000660358	0.441978	0.0209463	0.000322753	1.44424		509.3	50.92	422.499	7.93717	406.583	4.00277	96%
YTP-27003	55.8001	260.268	293.65	1.40644	0.88632	0.0678096	0.000939601	1.27804	0.0219144	0.136746	0.00158821	0.677343	0.0424126	0.000556277	1.16529		862.65	32.41	835.983	9.78433	826.236	9.01765	98%
YTP-27004	36.5005	63.5138	91.1814	1.33782	0.696566	0.104877	0.00153352	4.29088	0.0809344	0.296268	0.00346631	0.620291	0.0857819	0.00114723	1.507		1722.22	26.8475	1691.61	15.5748	1672.78	17.2618	98%
YTP-27005	82.7684	139.106	86.9344	0	1.60013	0.196397	0.00208661	15.1598	0.231087	0.559145	0.00641611	0.752777	0.158095	0.00203837	0.674915		2798.15	17.59	2825.33	14.6466	2863.09	26.573	98%
YTP-27006	54.6557	75.9003	127.171	0.123881	0.596839	0.115961	0.00138329	5.22775	0.0858961	0.326273	0.00361635	0.674575	0.0940297	0.00127976	1.74798		1894.75	21.7575	1857.15	14.0615	1820.29	17.6049	97%
YTP-27007	59.8443	99.343	351.667	0	0.282492	0.0716979	0.000843567	1.43871	0.025781	0.145292	0.00202343	0.777177	0.0449496	0.000789571	3.7228		977.47	28.705	905.181	10.7518	874.517	11.3989	96%
YTP-27008	40.8351	371.582	203.122	0.674852	1.82936	0.06628	0.00109523	1.1028	0.0192274	0.120741	0.0011453	0.544048	0.0367584	0.000431006	0.569547		816.665	30.5525	754.701	9.29858	734.83	6.59962	97%
YTP-27009	74.7342	501.827	737.939	3.65749	0.680038	0.063917	0.00104036	0.670173	0.0115845	0.0760475	0.000745973	0.567474	0.0256544	0.000323521	1.56753		738.895	33.33	520.818	7.05173	472.488	4.47627	90%
YTP-27010	72.4418	107.507	386.202	1.47442	0.278371	0.0704124	0.000950873	1.55832	0.0275006	0.16035	0.00206366	0.729265	0.0472876	0.000806003	4.35637		940.43	23.1475	953.801	10.9341	958.719	11.4765	99%
YTP-27011	8.82278	106.498	132.637	0.319062	0.802925	0.0587498	0.00222157	0.413562	0.0181654	0.0508815	0.000707725	0.316666	0.0163501	0.000519275	1.36754		566.7	83.32	351.437	13.0507	319.931	4.34483	90%
YTP-27012	27.7332	194.079	300.996	1.31198	0.644788	0.0563638	0.000981317	0.560975	0.0109143	0.0722254	0.000792284	0.563816	0.0228232	0.0003633	1.64148		477.82	38.885	452.161	7.10621	449.549	4.76954	99%
YTP-27013	15.0892	41.9013	86.8181	0.33171	0.482634	0.0701953	0.00169444	1.34282	0.0382774	0.138019	0.00143069	0.363649	0.0463188	0.00112754	2.14766		1000	50.0025	864.451	16.5999	833.448	8.11674	96%
YTP-27014	158.011	206.374	306.51	0.802853	0.673302	0.131643	0.00125142	6.93687	0.0938026	0.381738	0.00386502	0.748747	0.107007	0.00120974	1.56827		2120.06	16.665	2103.39	12.0853	2084.4	18.0671	99%
YTP-27015	57.0794	62.9812	326.192	0.195971	0.19308	0.0718636	0.000840426	1.5216	0.0240534	0.153335	0.00161051	0.664428	0.0466341	0.000636126	5.28715		983.335	19.445	939.123	9.7067	919.629	9.01542	97%
YTP-27016	38.4163	261.573	962.124	0	0.27187	0.0561458	0.00105442	0.264837	0.00553065	0.034271	0.000423225	0.591355	0.0124863	0.000275853	3.8817		457.45	40.7375	238.558	4.44285	217.224	2.64049	90%
YTP-27017	27.5755	473.585	612.82	1.19516	0.772796	0.0537658	0.000968104	0.252898	0.00516304	0.0341313	0.000361879	0.519339	0.0113136	0.000159884	1.35752		361.165	73.14	228.928	4.18716	216.353	2.25885	94%
YTP-27018	76.9257	140.046	410.264	0.314234	0.341356	0.0728148	0.000864341	1.58149	0.0223058	0.157596	0.00136396	0.613625	0.0470259	0.000611395	3.23782		1009.26	24.075	962.955	8.79801	943.403	7.61266	97%
YTP-27019	27.1897	468.078	510.749	0	0.916454	0.0534117	0.000983136	0.282707	0.00584117	0.0384289	0.000400127	0.503938	0.0122415	0.00018334	1.28033		346.35	40.7375	252.803	4.62703	243.087	2.48739	96%
YTP-27020	44.822	66.7875	99.58	0.738404	0.670691	0.117107	0.00151891	5.47827	0.0903567	0.339913	0.00402483	0.717899	0.0999868	0.00156273	1.56272		1922.22	17.75	1897.2	14.2208	1886.25	19.3905	99%
YTP-27021	125.511	75.1127	308.476	0.234938	0.243496	0.118412	0.00137713	5.54325	0.0896247	0.339409	0.00366245	0.667398	0.0988666	0.00141317	4.2405		1932.41	15.7425	1907.33	13.9683	1883.83	17.6562	98%
YTP-27022	59.4944	219.439	164.619	1.2042	1.33301	0.0915118	0.0011468	3.04959	0.0496592	0.241933	0.00280685	0.712468	0.0784134	0.0021878	0.894528		1457.41	24.07	1420.13	12.4888	1396.74	14.5888	98%
YTP-27023	41.2266	242.048	216.712	0	1.11691	0.0698228	0.00110103	1.30432	0.0239405	0.135523	0.0013943	0.560523	0.0413844	0.000572343	0.961216		924.07	27.62	847.628	10.565	819.297	7.92785	96%
YTP-27024	13.2649	129.828	253.206	0.784083	0.512737	0.0516108	0.00116423	0.301723	0.0067884	0.0424961	0.000383871	0.401492	0.0137915	0.000253239	2.16452		333.39	51.845	267.745	5.29829	268.286	2.37813	99%
YTP-27025	45.1572	86.7859	116.445	0.592563	0.745293	0.107651	0.00126687	4.2471	0.0593456	0.286171	0.00273298	0.683464	0.0871902	0.00107459	1.37834		1761.11	21.1425	1683.18	11.541	1622.36	13.726	96%
YTP-27026	31.5613	294.962	677.928	0.238206	0.435093	0.0535457	0.000846689	0.282901	0.0052015	0.0382785	0.000383789	0.54531	0.0120814	0.000190078	2.4003		353.76	35.1825	252.956	4.12044	242.154	2.38644	95%
YTP-27028	11.8488	77.7273	165.809	1.34037	0.468777	0.0542649	0.00137875	0.430506	0.0116172	0.0574325	0.000554077	0.357512	0.0183869	0.000345542	2.20875		383.385	57.4025	363.536	8.24968	359.992	3.3834	99%
YTP-27029	12.25	89.3266	208.61	1.5562	0.4282	0.0533278	0.0013168	0.356829	0.00979291	0.0485537	0.000598888	0.44944	0.015294	0.000320051	2.47014		342.65	55.55	309.844	7.33155	305.636	3.68561	98%
YTP-27030	14.9793	232.272	257.534	0.679101	0.901907	0.0567122	0.00179713	0.330659	0.0134989	0.0417866	0.000670293	0.392926	0.0136641	0.00035299	1.1465		479.67	70.3625	290.069	10.3024	263.898	4.15011	90%
YTP-27031	20.2838	75.3745	349.791	1.83875	0.215485	0.0549912	0.00102455	0.382594	0.00815198	0.0502994	0.000556938	0.519661	0.0154131	0.000285681	4.72965		413.01	42.59	328.945	5.99103	316.359	3.42258	96%
YTP-27032	21.6544	287.094	212.158	0	1.35321	0.0606518	0.00157138	0.544654	0.0173459	0.0647114	0.000982833	0.476897	0.021491	0.000393454	0.877584		627.795	57.3975	441.489	11.4063	404.214	5.95468	91%
YTP-27033	13.7673	141.978	299.336	0.674449	0.474311	0.0529315	0.00117383	0.274381	0.00661634	0.0375207	0.000391562	0.432778	0.0117542	0.000189298	2.20385		324.13	49.995	246.19	5.27433	237.447	2.43626	96%
YTP-27034	6.00219	80.2037	103.836	1.13789	0.772409	0.0547828	0.0017332	0.325283	0.0107511	0.0429059	0.000410201	0.28926	0.0139334	0.000263198	1.39261		466.71	70.3625	285.958	8.23938	270.82	2.53975	94%
YTP-27035	23.2392	466.094	416.261	0	1.11972	0.054472	0.00100516	0.296232	0.00630917	0.03932	0.000431299	0.515021	0.0122228	0.000169014	0.92835		390.79	40.7375	263.453	4.94543	248.617	2.67851	94%
YTP-27036	108.322	92.1197	687.786	0.739402	0.133937	0.0676477	0.000711284	1.29835	0.0169078	0.138925	0.00139821	0.772854	0.0435109	0.000672302	7.75664		857.4	22.225	844.995	7.49171	838.582	7.92694	99%
YTP-27037	19.606	312.072	404.291	0.252319	0.771899	0.0517209	0.00103166	0.261528	0.00557982	0.0366086	0.000375075	0.48021	0.0112493	0.000160046	1.33981		272.285	41.6625	235.897	4.49397	231.777	2.33585	98%
YTP-27038	13.884	105.859	139.463	1.21109	0.759052	0.0615331	0.00152615	0.644072	0.0184693	0.0755215	0.000847783	0.39147	0.024342	0.000490983	1.35908		657.42	51.8475	504.824	11.4118	469.335	5.08772	92%
YTP-27039	19.5227	268.913	303.83	1.12601	0.885075	0.0541027	0.00110422	0.356068	0.00770483	0.0476762	0.000506241	0.49071	0.0143953	0.000205313	1.17658		375.98	46.2925	309.275	5.77298	300.239	3.11915	97%
YTP-27040	53.7064	335.951	540.699	0	0.621328	0.0585799	0.000851825	0.630747	0.0113779	0.0777903	0.000876687	0.624758	0.0240122	0.000338281	1.68189		550.035	31.475	496.561	7.09249	482.92	5.25007	97%
YTP-27041	111.069	76.0577	237.357	0	0.320436	0.12569	0.00146418	6.52641	0.098438	0.375353	0.0041121	0.726332	0.105197	0.00155526	3.23477		2038.58	20.675	2049.47	13.3531	2054.54	19.3057	99%
YTP-27042	29.641	133.371	792.67	0.99229	0.168256	0.0497443	0.00084163	0.229662	0.00442184	0.0334238	0.000389283	0.604916	0.0105213	0.000199313	6.15163		183.415	38.88	209.919	3.65409	211.941	2.43101	99%
YTP-27043	18.89	102.102	114.794	0.926342	0.889435	0.0638957	0.00116358	1.06603	0.0201804	0.120876	0.00119849	0.523768	0.0369553	0.000527161	1.17228		738.895	38.885	736.793	9.93059	735.601	6.90425	99%
YTP-27044	26.3851	79.716	43.0255	0.778259	1.85276	0.126202	0.00184945	6.39259	0.112382	0.366765	0.00458055	0.710415	0.105205	0.00165991	0.55781		2055.55	25.9225	2031.25	15.4975	2014.16	21.6318	99%
YTP-27045	77.3148	198.217	377.638	1.03276	0.524887	0.0726603	0.00086958	1.62158	0.0235264	0.161401	0.00161485	0.68962	0.0513904	0.000682745	2.06325		1005.55	19.4425	978.605	9.13642	964.559	8.97842	98%
YTP-27046	18.2432	83.843	200.898	0.619336	0.417341	0.0637247	0.00185154	0.645578	0.0182047	0.0739079	0.000926605	0.444599	0.0266915	0.000662894	2.57255		731.49	30.5525	505.754	11.2383	459.656	5.56772	90%
YTP-27047	165.898	146.896	386.765	0	0.379806	0.114582	0.00119184	5.47996	0.0850194	0.345601	0.00427864	0.797976	0.0974113	0.00140195	2.94706		1873.15	18.515	1897.46	13.3845	1913.56	20.5238	99%
YTP-27049	157.742	145.242	231.223	0	0.628149	0.174012	0.00197299	11.7455	0.172173	0.487991	0.00547616	0.76554	0.134655	0.00186467	1.67822		2598.15	19.5975	2584.33	13.8285	2561.98	23.7646	99%
YTP-27050	39.5348	57.6273	132.083	0	0.436295	0.0883223	0.00130965	2.8921	0.051966	0.236864	0.00295234	0.693681	0.0712825	0.00105282	2.37807		1390.74	28.24	1379.85	13.5895	1370.38	15.4051	99%
YTP-27051	86.4476	101.462	442.55	0.980948	0.229266	0.0711422	0.000945085	1.63137	0.0272649	0.165929	0.00201444	0.726409	0.0522894	0.000814705	4.41089		961.11	-5.71	982.389	10.5421	989.64	11.1506	99%
YTP-27052	62.2816	74.1374	140.659	0	0.527071	0.113804	0.00136581	5.31772	0.0883676	0.337863	0.00423137	0.753655	0.0977625	0.00151066	1.95179		1860.81	22.0675	1871.72	14.2593	1876.38	20.4138	99%
YTP-27053	31.4041	217.155	592.162	0.360347	0.366715	0.0513817	0.000927905	0.320647	0.00719547	0.0452553	0.000696596	0.68593	0.0147957	0.00032841	3.15696		257.47	40.735	282.401	5.53559	285.326	4.29888	98%
YTP-27054	44.2056	110.298	512.65	1.28399	0.215153	0.0592968	0.00105576	0.606651	0.0139138	0.0736375	0.000732319	0.433605	0.0263725	0.000826381	4.83902		588.915	38.88	481.446	8.79944	458.033	4.40399	95%
YTP-27055	24.8884	209.163	484.811	1.97619	0.431431	0.0521081	0.000929138	0.294464	0.00560607	0.040934	0.000381659	0.48974	0.0137772	0.000211566	2.40438		300.06	37.96	262.067	4.40104	258.62	2.3677	98%
YTP-27057	19.4799	114.624	220.994	0.525171	0.518674	0.0557899	0.00106223	0.540054	0.0111471	0.070139	0.000670619	0.463225	0.0205957	0.000309767	2.02322		442.64	10.185	438.46	7.35551	436.993	4.04663	99%
YTP-27058	85.4747	130.521	128.634	1.02152	1.01467	0.159415	0.00181549	9.96386	0.152632	0.452963	0.00522391	0.75286	0.126063	0.00177548	1.04383		2449.69	18.67	2431.44	14.2319	2408.41	23.2136	99%
YTP-27059	25.3264	188.19	342.777	0	0.549017	0.0549319	0.000954294	0.433138	0.00810559	0.0571606	0.00050973	0.476524	0.0186767	0.000273865	1.90188		409.31	43.515	365.403	5.74821	358.335	3.11428	98%
YTP-27060	195.209	153.393	319.594	1.28413	0.479962	0.160909	0.00175299	10.1265	0.162175	0.45551	0.0051757	0.709493	0.124805	0.00214501	2.1631		2465.12	18.52	2446.4	14.8929	2419.7	22.9603	98%
YTP-27061	40.711	361.577	436.989	0.0930831	0.827428	0.0554066	0.000923099	0.524427	0.00984923	0.0685949	0.000676689	0.525268	0.021706	0.000313987	1.27522		427.825	37.035	428.105	6.56678	427.685	4.08873	99%
YTP-27062	223.069	189.822	397.24	0.278566	0.477853	0.1458	0.00148573	8.62564	0.134191	0.428182	0.00509859	0.765403	0.120901	0.00173246	2.1908		2298.15	17.595	2299.26	14.2415	2297.51	23.047	99%
YTP-27063	58.0099	106.673	342.046	0	0.311866	0.0679694	0.000888292	1.39117	0.0356821	0.147024	0.00275393	0.730288	0.0449291	0.000577058	3.35188		877.775	27.0075	885.191	15.164	884.258	15.4848	99%
YTP-27064	16.418	147.593	162.079	0	0.910624	0.0580903	0.00146019	0.595029	0.0163966	0.0741769	0.000821856	0.402079	0.0233689	0.000402074	1.23445		531.52	55.5475	474.074	10.4429	461.271	4.93846	97%
YTP-27065	10.06	82.877	146.54	0	0.565559	0.0525526	0.00133417	0.390971	0.00988254	0.0539748	0.000467388	0.342581	0.0163321	0.000272154	1.85726		309.32	57.4025	335.079	7.21767	338.879	2.86453	98%
YTP-27066	38.0012	83.6544	295.386	0.887979	0.283204	0.0621786	0.000923979	0.945678	0.0168731	0.109935	0.00107306	0.547063	0.0335336	0.000483387	3.5895		679.64	36.1075	675.85	8.81746	672.373	6.24283	99%
YTP-27067	215.302	58.8978	515.468	1.029	0.114261	0.114503	0.00115326	5.57325	0.0822768	0.351861	0.00418935	0.806503	0.0997361	0.00147578	9.2073		1871.91	22.99	1911.97	12.7758	1943.48	20.0046	98%
YTP-27068	16.1833	218.772	335.315	0	0.652439	0.0513987	0.00113529	0.271915	0.00683111	0.0382479	0.000457078	0.47569	0.011609	0.000209442	1.91783		257.47	51.845	244.224	5.45587	241.964	2.84097	99%
YTP-27069	6.93962	115.121	130.033	0.158169	0.885326	0.0564206	0.00275959	0.300496	0.0130575	0.0387567	0.000738705	0.438635	0.0127096	0.000376541	1.17746		477.82	102.767	266.787	10.1965	245.122	4.58624	91%
YTP-27070	35.1506	826.874	546.212	2.53526	1.51383	0.0517657	0.000934847	0.30259	0.00649852	0.0422226	0.000547571	0.603858	0.0126362	0.000182765	0.711012		275.99	42.5875	268.421	5.06895	266.595	3.38992	99%
YTP-27071	28.778	138.702	328.875	0	0.421746	0.0613177	0.00172007	0.616967	0.0180571	0.0726859	0.000726249	0.341388	0.0240401	0.000529614	2.46706		650.015	59.25	487.944	11.3439	452.317	4.3713	92%
YTP-27072	51.8258	293.336	607.608	0.84077	0.482772	0.0546199	0.000773999	0.540302	0.00897819	0.071551	0.00077317	0.65029	0.0221928	0.000320395	2.13468		398.2	31.4775	438.624	5.92603	445.493	4.65758	98%
YTP-27073	55.4698	144.233	262.887	0	0.548649	0.0744777	0.000988328	1.75643	0.0280407	0.170602	0.00180229	0.66173	0.0523425	0.000744628	1.86343		1053.71	26.6975	1029.53	10.3531	1015.43	9.94022	98%
YTP-27074	33.3524	124.951	187.686	1.92559	0.665746	0.0666191	0.000965133	1.28285	0.0210493	0.13932	0.00133262	0.582951	0.043383	0.000615845	1.52364		825.61	31.4775	838.124	9.37976	840.818	7.55378	99%
YTP-27075	25.1963	35.049	64.164	1.23827	0.546241	0.102663	0.00139866	4.37728	0.0698576	0.308494	0.00301968	0.613344	0.0894001	0.00128517	1.84856		1672.53	25.4675	1708.06	13.2421	1733.29	14.9061	98%
YTP-27076	50.9444	69.9803	78.4943	0.289236	0.891534	0.158566	0.00188048	10.0377	0.144728	0.458191	0.00446666	0.676114	0.131582	0.00163452	1.1139		2440.43	20.06	2438.26	13.4166	2431.56	19.79	99%
YTP-27077	15.7447	114.368	84.3264	1.35911	1.35625	0.0677607	0.00153374	1.17086	0.0296795	0.124847	0.00122314	0.3865	0.0397647	0.000622333	0.741911		861.105	48.15	787.048	13.8924	758.401	7.02169	96%
