# Supplementary material for: Provenance and tectonic settings of Late Triassic–Jurassic deposits in the southwestern margin of the Yangtze Block: Evidence from whole-rock elemental compositions and detrital zircon U‒Pb ages and Hf isotopes, SW China
Source: Research Square preprint supplement (doi:10.21203/rs.3.rs-5860486/v1), 2025-04-24
Supplement: Supplementary file 3 [file 927ab65fb0da7ce1cdd919c1.xlsx]

## Sheet: Sheet1
Formation	Samples	SiO2	TiO2	Al2O3	TFe2O3	MnO	MgO	CaO	Na2O	K2O	P2O5	Li	Be	Sc	V	Cr	Co	Ni	Cu	Zn	Ga	Rb	Sr	Y	Zr	Nb	Mo	Cd	Sn	Cs	Ba	La	Ce	Pr	Nd	Sm	Eu	Gd	Tb	Dy	Ho	Er	Tm	Yb	Lu	Hf	Ta	Tl	Pb
Xujiahe	XJH-H0	93	0.04	2.91	0.53	0	0.1	0.04	0.03	1.03	0.01	13.6	0.21	0.9	4.86	5.43	0.18	0.13	8.1	6.91	3.93	29	15.18	7.05	44.12	1.38	0.29	<0.02	2.48	0.54	89.58	6.97	12.5	1.62	5.84	1	0.18	0.98	0.18	1.14	0.24	0.75	0.14	0.82	0.13	1.64	0.21	0.2	2.24
	XJH-H1	70.35	0.68	13.92	4.75	0.06	1.29	0.42	0.42	2.94	0.16	25	2.2	12.9	101.84	72.2	13	36.1	32	56.5	18.2	118	55.16	19.4	227.03	12.6	0.32	0.083	1.97	5.99	408.65	37.2	69.1	8.38	31.4	5.6	1.06	4.44	0.68	3.6	0.7	2.14	0.4	2.29	0.36	6.24	1.23	0.62	18.4
	XJH-H2	70.95	0.55	11.54	4.22	0.02	1.14	0.31	0.51	2.38	0.14	33.6	1.48	10.5	82.97	58	18.1	39.4	22.8	67.9	14.5	89.7	48.47	20.1	216.63	9.82	0.84	0.25	2.38	4.07	307.34	33.1	63.2	7.68	29.2	5.51	1.11	4.75	0.73	3.83	0.74	2.15	0.38	2.14	0.32	5.41	1.1	0.52	23.3
Ziliujing	YTP-0-H1	73.01	0.99	16.6	2.26	0.01	0.24	0.22	0.23	0.54	0.03	76.0348	1.39215	13.1112	94.6706	74.0045	3.67574	7.10712	6.53604	12.3617	18.5892	28.2938	76.5749	25.1896	296.643	19.0256	0.398763	0.220966	3.60722	3.20045	139.211	31.0699	65.8095	7.48209	27.2511	4.82269	0.908913	3.7509	0.607202	3.97455	0.869717	2.6333	0.397287	2.67649	0.401855	8.0182	1.23135	0.174721	13.2998
	YTP-1-H1	88.3	0.36	5.67	2.92	0.01	0.25	0.11	0.08	0.35	0.02	13.1139	0.603331	6.18515	40.4432	33.0881	2.84541	4.47876	3.99056	22.2806	8.57274	17.9914	39.3087	11.2341	172.294	7.23187	0.141009	0.173318	1.38832	2.2988	135.763	24.1764	43.3662	4.91366	16.4774	2.71886	0.476511	1.98089	0.314819	1.86984	0.388259	1.12342	0.169215	1.11153	0.163729	4.59131	0.528708	0.112406	15.2524
	YTP-2-H1	62.83	0.89	21.73	4.02	0.01	1.06	0.42	0.46	2.09	0.04	155.447	3.70593	19.4316	156.928	112.106	8.71378	35.3085	22.2802	60.5678	28.9449	182.464	114.165	32.3791	204.693	19.7913	0.168336	0.172938	4.76208	17.5702	387.394	43.8227	86.7071	10.3249	33.6923	6.15707	1.16426	5.02863	0.898022	5.68672	1.21054	3.72015	0.559145	3.68058	0.548114	5.7907	1.46748	1.08	8.0291
	YTP-4-H1	73.68	0.57	8.55	4.71	0.12	1.61	3.45	0.15	1.17	0.08	22.1663	1.29375	7.09252	60.8684	58.7164	11.5305	26.183	12.4636	67.4733	11.5219	55.8101	73.5916	19.5072	375.121	12.4813	0.16531	0.38564	1.96927	3.03363	204.772	29.847	58.4925	6.7297	23.6469	4.07411	0.702158	3.113	0.504656	3.15507	0.684921	2.08059	0.311103	2.1286	0.334561	9.8195	0.921496	0.29777	33.8951
	YTP-5-H1	66.89	0.83	15.96	6.67	0.11	1.3	0.3	0.29	2.49	0.12	33.8721	2.89841	13.449	114.278	82.6914	10.407	36.7091	30.0179	92.559	19.5451	117.235	71.5105	29.994	249.459	17.3936	0.184772	0.402739	3.36893	7.31248	408.897	42.2978	83.7059	10.4385	35.5941	6.58744	1.24153	5.22552	0.868262	5.18531	1.08264	3.25372	0.490828	3.1619	0.461976	6.84124	1.26706	0.637923	48.1196
Shaximiao	YTP-7-H1	86.18	0.5	6.24	2.36	0.4	0.68	0.35	0.21	0.8	0.09	14.9298	1.02483	5.01137	53.2364	47.3986	8.66113	19.0056	134.198	42.0013	8.15633	37.3812	41.1941	33.0133	361.429	9.94215	0.413087	0.45726	1.46231	1.72683	206.037	31.9245	59.3855	6.90546	24.7268	5.07629	1.11643	5.34425	0.881156	5.1214	1.02225	2.90715	0.412002	2.64342	0.395148	9.15901	0.762538	0.22001	15.2114
	YTP-9-H1	68.84	0.62	11.42	3.52	0.12	2.14	4.16	0.33	1.76	0.1	41.5068	2.15954	10.2327	90.0821	66.0654	14.6159	31.8288	24.8863	71.6539	15.2321	97.0922	89.8018	23.7588	203.998	13.1423	0.249728	0.274276	2.57066	6.30856	331.526	34.2509	69.2436	7.92128	28.9577	5.61299	1.05383	4.45781	0.731685	4.22033	0.879499	2.48593	0.375216	2.50062	0.348278	5.53431	1.00673	0.533379	11.5896
	YTP-10-H1	85.08	0.4	7.39	1.28	0.08	0.87	0.79	0.4	0.85	0.08	20.3813	1.10139	4.97162	53.9115	42.4747	7.96516	19.9777	19.3073	33.8233	9.18537	39.7532	40.9426	11.5322	152.811	8.30514	0.213965	0.282036	1.56594	1.85744	205.679	24.3046	43.6225	5.25076	18.5482	3.4027	0.638968	2.73212	0.409197	2.11091	0.417016	1.20741	0.179725	1.1952	0.174413	3.86881	0.627664	0.241797	6.80058
	YTP-11-H1	79.27	0.51	8.95	1.8	0.03	1.63	1.57	0.38	1.23	0.09	31.8386	1.34659	7.45846	63.6769	48.099	9.69996	22.7694	35.082	52.2879	10.6549	59.5986	50.7381	13.9316	191.338	10.1796	0.126123	0.180673	1.84758	3.87797	204.855	24.9663	47.2025	5.34546	18.3576	3.13821	0.55996	2.45248	0.399634	2.41431	0.489911	1.44609	0.229123	1.58881	0.230338	5.13994	0.768138	0.323026	5.7257
	YTP-12-H1	89.17	0.37	5.93	0.92	0.3	0.53	0.33	0.25	0.62	0.07	16.9079	0.7656	4.6759	40.9935	37.5516	5.25396	16.196	17.2423	27.3344	7.02487	27.8461	35.9002	13.8237	184.987	7.20204	1.38876	0.471472	1.20767	1.12984	207.608	20.7066	42.1109	4.82559	17.6602	3.54805	0.756805	3.27686	0.51133	2.84086	0.531675	1.5489	0.222817	1.49633	0.218123	4.78652	0.544279	0.170458	10.1101
	YTP-14-H1	85.6	0.24	2.93	0.45	0.12	0.42	4.88	0.26	0.33	0.04	9.38119	0.377065	3.34429	22.2435	28.3446	2.84664	6.9841	17.5762	14.9103	3.49442	14.6323	88.1539	13.5001	260.892	4.87943	0.163707	0.635126	0.635949	0.838897	67.9586	16.3525	33.2332	4.26492	16.1522	3.20813	0.620258	2.85368	0.447829	2.40439	0.457887	1.2663	0.191286	1.23747	0.182773	6.4272	0.363812	0.0985569	6.32514
	YTP-15-H1	70.16	0.52	6.43	1.06	0.2	1.59	8.98	0.23	0.95	0.08	12.8632	0.968555	5.86545	48.3765	52.3225	8.10533	16.2219	27.8483	41.7048	8.05051	47.6501	83.2615	24.6696	619.956	10.7696	0.335245	0.826453	1.60192	2.73476	262.976	29.376	59.1619	6.77315	24.907	4.81089	0.921831	4.29027	0.700931	3.90774	0.825922	2.39704	0.381522	2.5482	0.394154	15.7307	0.799067	0.299499	6.16207
	YTP-17-H1	79.63	0.41	7.38	1.45	0.12	1.29	3.5	0.94	0.62	0.07	26.9083	0.817755	5.8224	44.8332	35.3302	8.99241	15.9302	18.5406	42.94	9.20867	31.3501	76.1249	18.761	226.548	7.91832	0.137635	0.380374	1.14478	1.77766	125.923	22.0968	43.5419	4.95841	17.5847	3.61108	0.796964	3.32251	0.551202	3.21779	0.610473	1.7622	0.261705	1.70568	0.245029	5.71122	0.586235	0.173204	4.83774
	YTP-19-H1	72.18	0.51	12.35	2.69	0.09	2.13	2.37	2.44	0.56	0.12	34.666	1.09578	7.43191	45.3706	39.6653	10.7941	17.9556	12.6565	56.3804	14.54	23.0926	111.545	15.7453	191.461	9.12128	0.174985	0.358929	1.35024	0.834591	495.423	30.8444	62.8359	6.99772	25.3041	4.4003	0.957899	3.2655	0.512104	2.83367	0.569282	1.56959	0.24594	1.5515	0.232653	4.83455	0.683532	0.122475	5.37869
	YTP-20-H1	71.84	0.72	14.05	2.91	0.03	2.55	0.62	1.66	1.46	0.19	41.3498	1.5637	11.2323	92.0863	75.9514	18.441	36.5975	24.3008	86.4025	17.6335	64.9897	92.6333	19.3821	241.225	14.33	0.221722	0.228578	2.13801	3.63479	230.206	32.1796	63.5348	7.30874	26.0037	4.74107	0.954976	3.71351	0.552907	3.22281	0.671843	2.0344	0.31846	2.06742	0.313386	6.2601	0.972832	0.419624	8.53497
	YTP-21-H1	69.77	0.54	12.5	3.06	0.13	2.22	3.25	2.19	0.63	0.13	43.4289	1.22061	8.58091	59.6542	49.0623	16.7926	46.0294	16.0104	64.93	13.7049	27.2963	120.96	20.2863	151.594	10.1805	0.171825	0.430505	1.414	1.11853	131.123	20.5535	39.7677	4.48979	16.877	4.11138	1.0216	4.11031	0.669322	3.66903	0.699159	1.94856	0.293236	1.82436	0.263723	4.04881	0.770689	0.161057	10.6444
	YTP-22-H1	70.5	0.59	13.85	2.84	0.11	2.29	1.86	1.96	1.14	0.13	45.7026	1.66545	9.02175	63.3369	52.6513	12.4382	22.5496	16.4406	64.9078	16.5819	51.7709	116.301	24.5855	204.025	12.0788	0.183854	0.28781	1.94449	2.98688	171.375	34.909	70.0619	8.20689	29.6419	5.64387	1.16296	4.67576	0.723094	4.12298	0.805362	2.24087	0.335277	2.13417	0.313318	5.40278	0.892698	0.316635	8.95111
Suining	YTP-27-H1	85.17	0.42	7.06	1.92	0.17	0.95	0.37	1.12	1.03	0.1	34.2743	1.10015	5.77797	46.1334	45.3734	6.56381	18.0225	59.7415	37.6789	8.44946	45.0094	51.4488	22.87	296.967	8.82865	0.190613	0.523123	1.47667	2.04164	205.588	27.249	54.2805	6.51328	23.907	5.09326	1.07642	4.78086	0.744016	4.18266	0.784737	2.17817	0.324767	2.14442	0.318569	7.62435	0.67068	0.266237	11.5992
[truncated: 2 more columns]
